# Supplementary material for: Using sequence signatures and kink-turn motifs in knowledge-based statistical potentials for RNA structure prediction
Source: PubMed Central journal article supplement — Nucleic Acids Res. 2017 Feb 1;45(9):5414–22. doi: 10.1093/nar/gkx045 (PMC5435971; doi:10.1093/nar/gkx045), 2017-02-01
Supplement: gkx045_supp.pdf [file gkx045_supp.pdf]

## Supplementary Material

### Statistical Potentials

#### i) *Internal Loop Potentials (Bend and Torsion Angles)*

An internal loop is defined by two double stranded regions connected by a bulge. In RAG-3D, these two double stranded regions are represented as two edges ( $V_1$  and  $V_2$ ) so that the vector  $V_1$  points toward the bulge, and the vector  $V_2$  points away from the bulge (see Figure S1). Then, the bending angle ( $\theta$ ) is defined as the angle between  $V_1$  and  $V_2$ . This definition is consistent with the bend angle definition given by Lilley et al. in (1).

Let the third vector ( $V_3$ ) connect  $V_1$  and  $V_2$ . Then, the torsion angle ( $\tau$ ) is defined as the angle between the planes defined by  $V_1V_3$  and  $V_3V_2$  ( $n_1$  and  $n_2$ , respectively). Specifically, the

$$\text{bend angle } \theta = \pi - \cos^{-1} \left( \frac{|V_1 \cdot V_2|}{|V_1||V_2|} \right), \text{ and the}$$

$$\text{torsion angle } \tau = \text{sign}(n_1 \cdot V_3) \cos^{-1} \left( \frac{|n_1 \cdot n_2|}{|n_1||n_2|} \right),$$

$$\text{where } \text{sign}(x) = \begin{cases} -1 & \text{if } x < 0 \\ 0 & \text{if } x = 0. \\ 1 & \text{if } x > 0 \end{cases}$$

#### ii) *Radii of Gyration*

The third potential of our scoring function is  $\Delta G_{R_g}$  and is defined as the absolute difference of  $R_g$  from estimated radii of gyration  $\overline{R_g}$ :

$$\Delta G_{R_g} = |R - \overline{R}|.$$

$R_g$  is defined as the mean distance from each vertex to the center of mass of all vertices in a RAG-3D graph representation,  $R_g = \sum_i |V_i - \overline{V}| / V$ . The estimated  $\overline{R_g}$  is calculated based on the sequence length

( $L$ ) and the number of vertices ( $V$ ) using the logarithmic relationship  $\overline{R_g}(L, V) = a * \ln(L) + b * \ln(V) + c$ ,

where  $a = 8.58$ ,  $b = 2.30$ , and  $c = -19.50$  (2).  $R_g$  was also used as a RNA 3D model selection criteria by Hofacker et al. (3).

### ***iii) Pseudoknot Length***

We add a term to the scoring function for structures with pseudoknot, using an additional edge to handle pseudoknot interactions:

$$\Delta G_{pk} = |D - \bar{D}|.$$

Here  $D$  is the length of the pseudoknot edge of the graph at each MC step, and  $\bar{D}$  is the length of the pseudoknot edge of reference graph. At this point, we can only handle the pseudoknot structures if the reference is known.

Figure S1

A

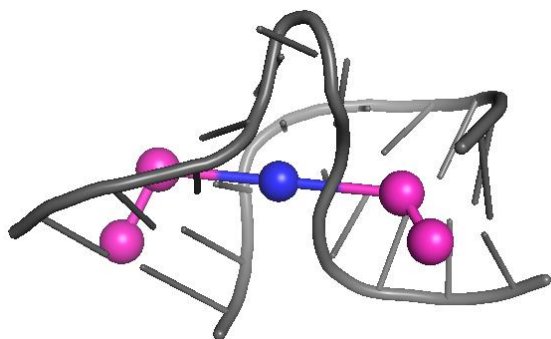

B

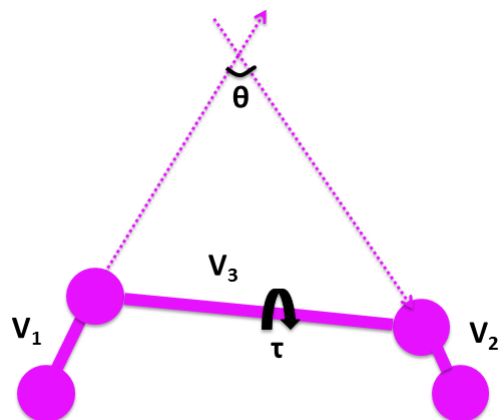

Figure S1. Knowledge-based internal loop potentials. (A) An internal loop defined by two helices and a connecting with a bulge represented as a RAG-3D graph. (B) Bend and torsion angles of the internal loop. The bend angle  $\theta$  represents the angle between two helical axes  $V_1$  and  $V_2$ . The torsion angle shows the angle between  $V_1V_3$  and  $V_3V_2$  planes.

Figure S2

**A. RNA 2D Structure**

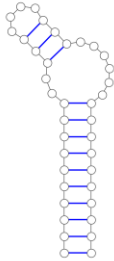

**B. RAG (2D) Graph**

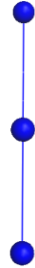

**C. RAG-3D Graph**

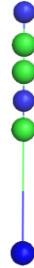

**Figure S2. RNA graph representations. (A) RNA hairpin and internal loop elements. (B) RAG representation which defines hairpins and internal loops as vertices and stems as edges. (C) RAG-3D representation which defines each helix by one edge and two vertices.**

Figure S3

2/5

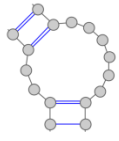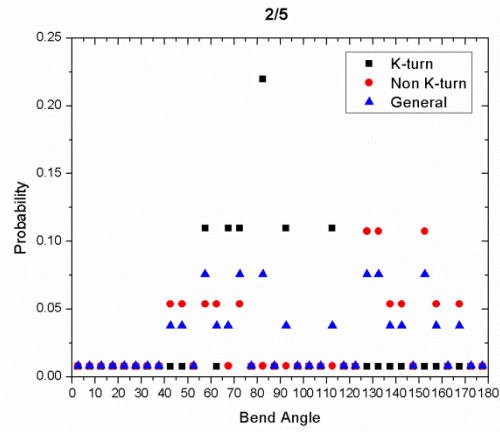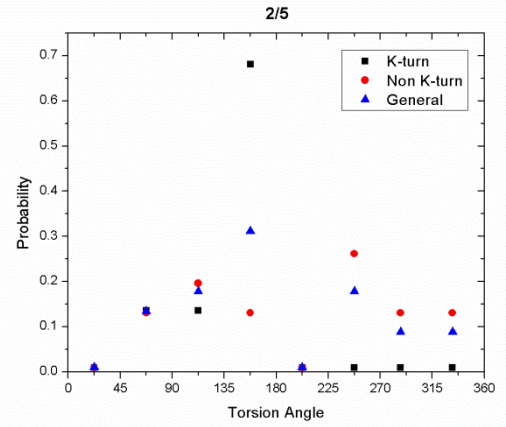

2/6+

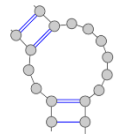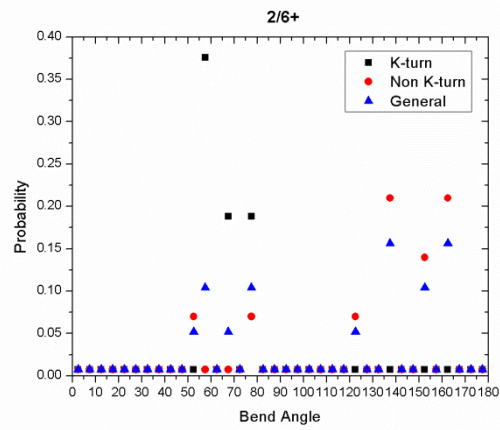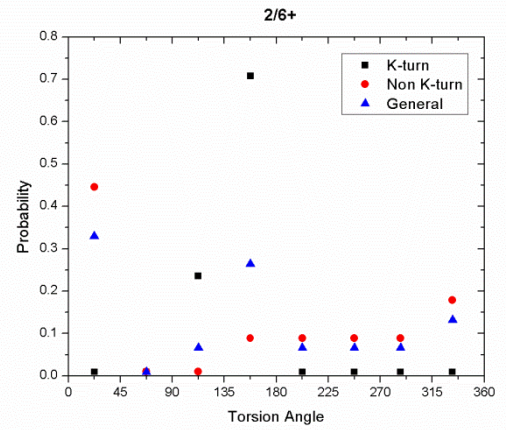

3/6+

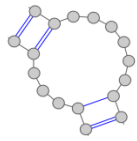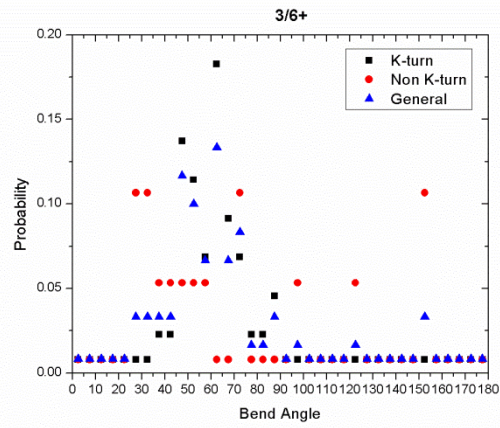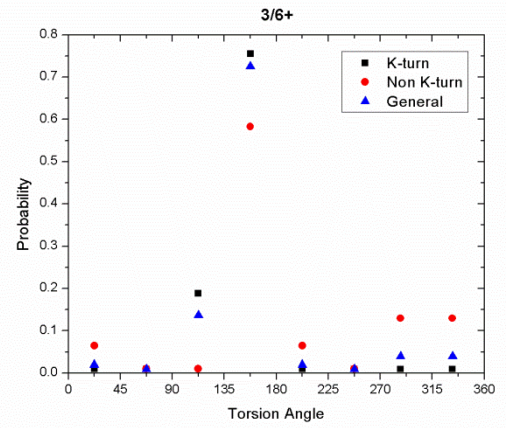

Figure S3. Statistical potential distributions of k-turn, and non k-turn motifs and all data

Figure S4

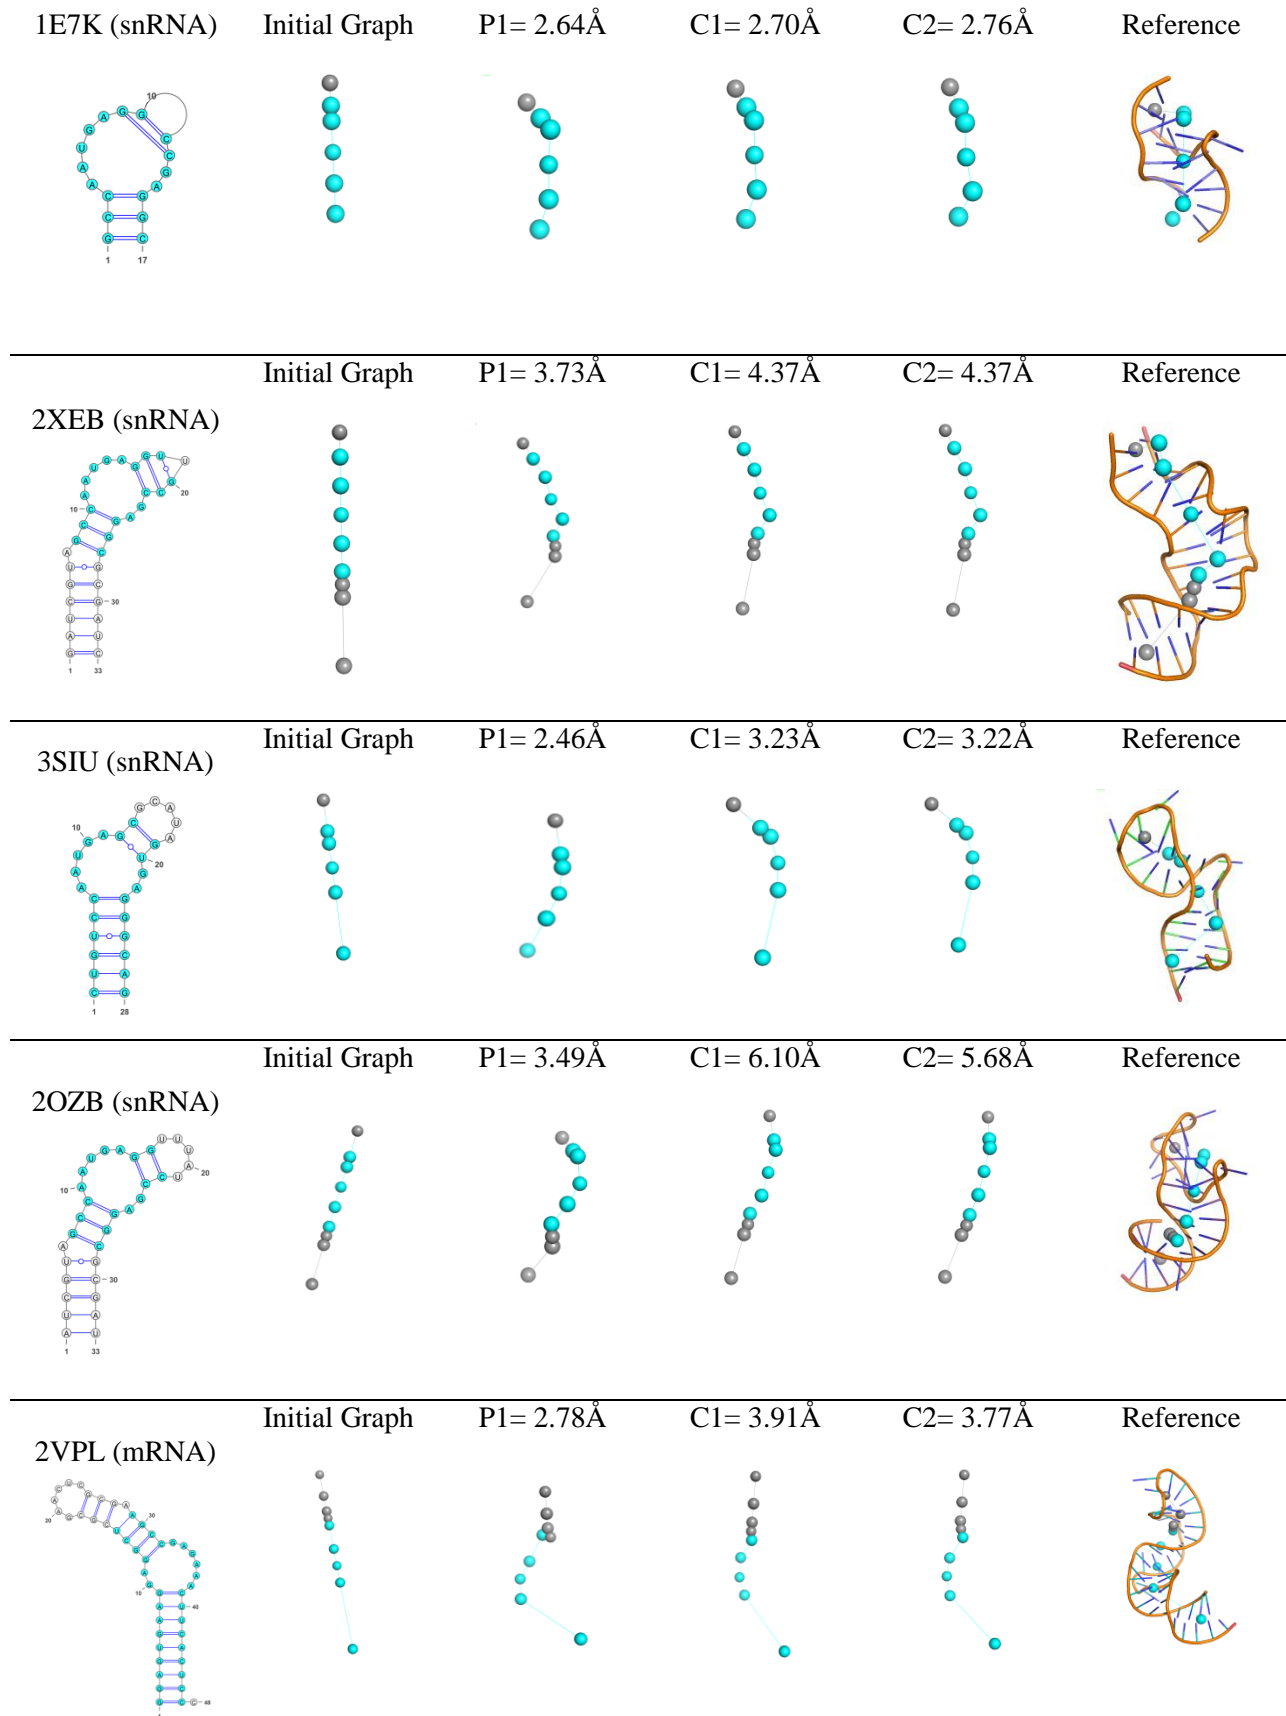

Figure S4

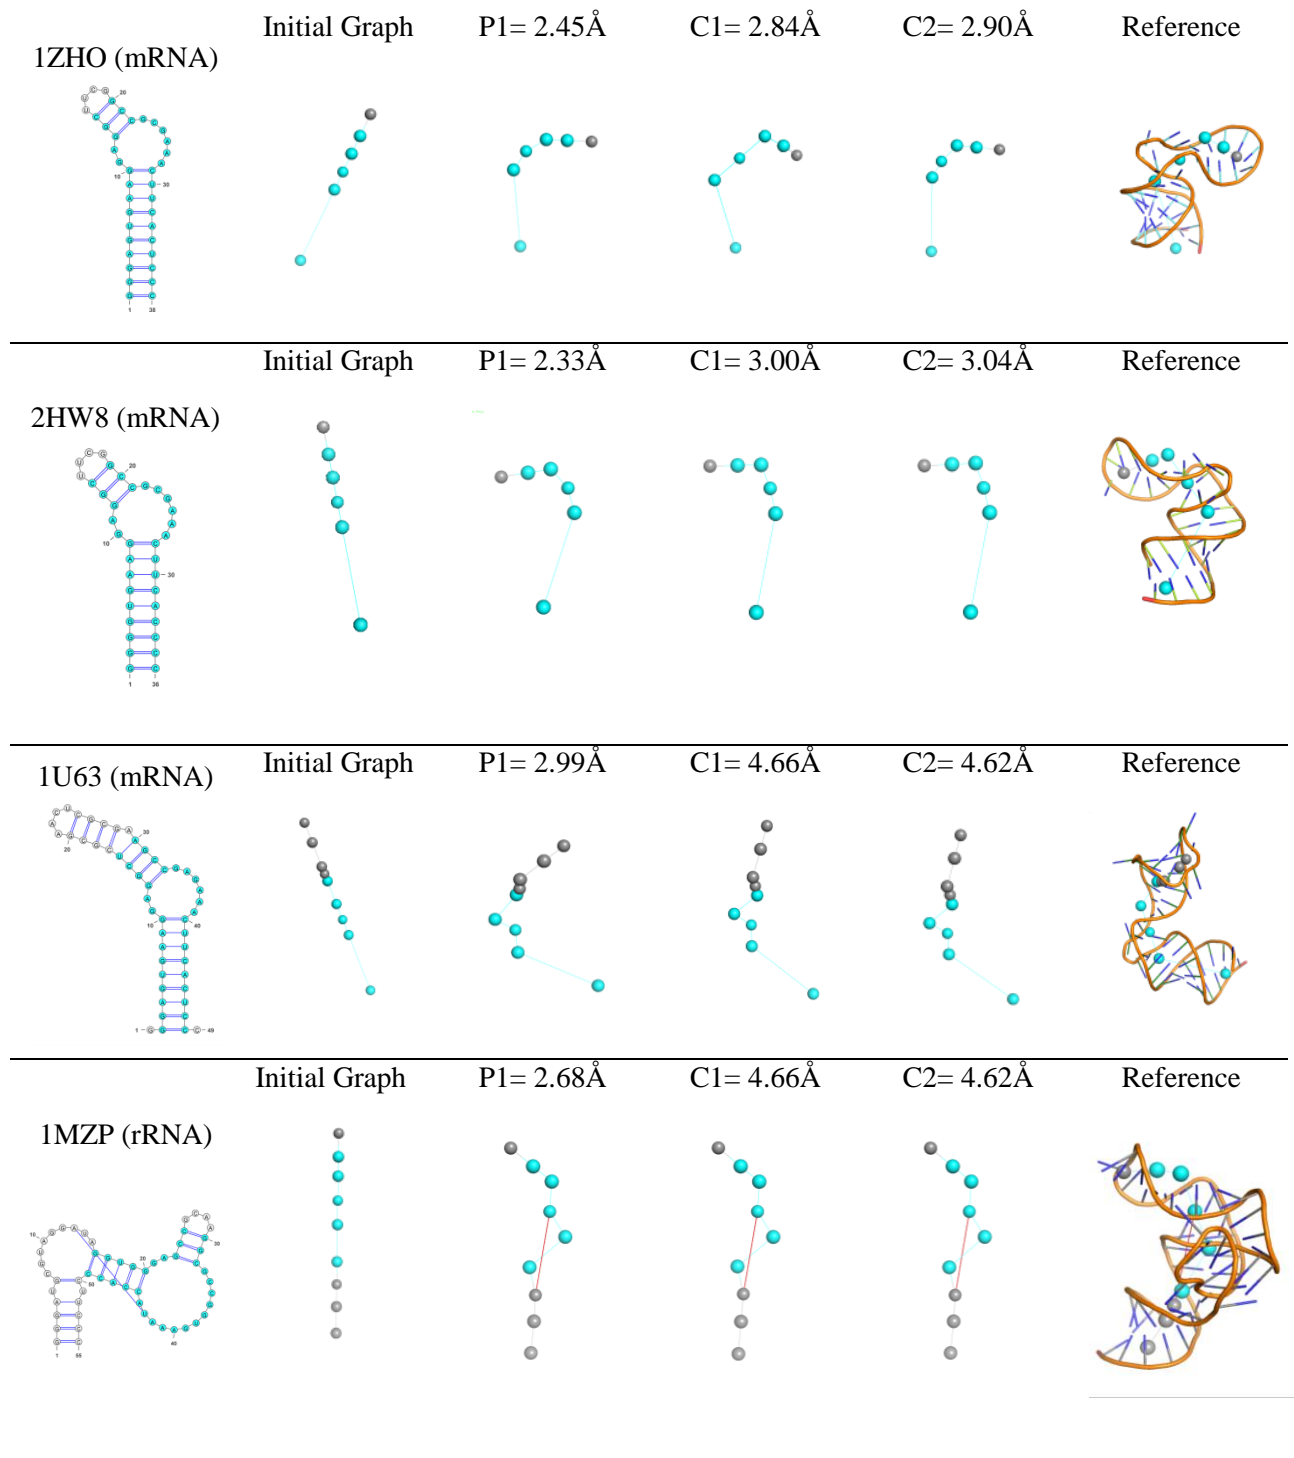

Figure S4

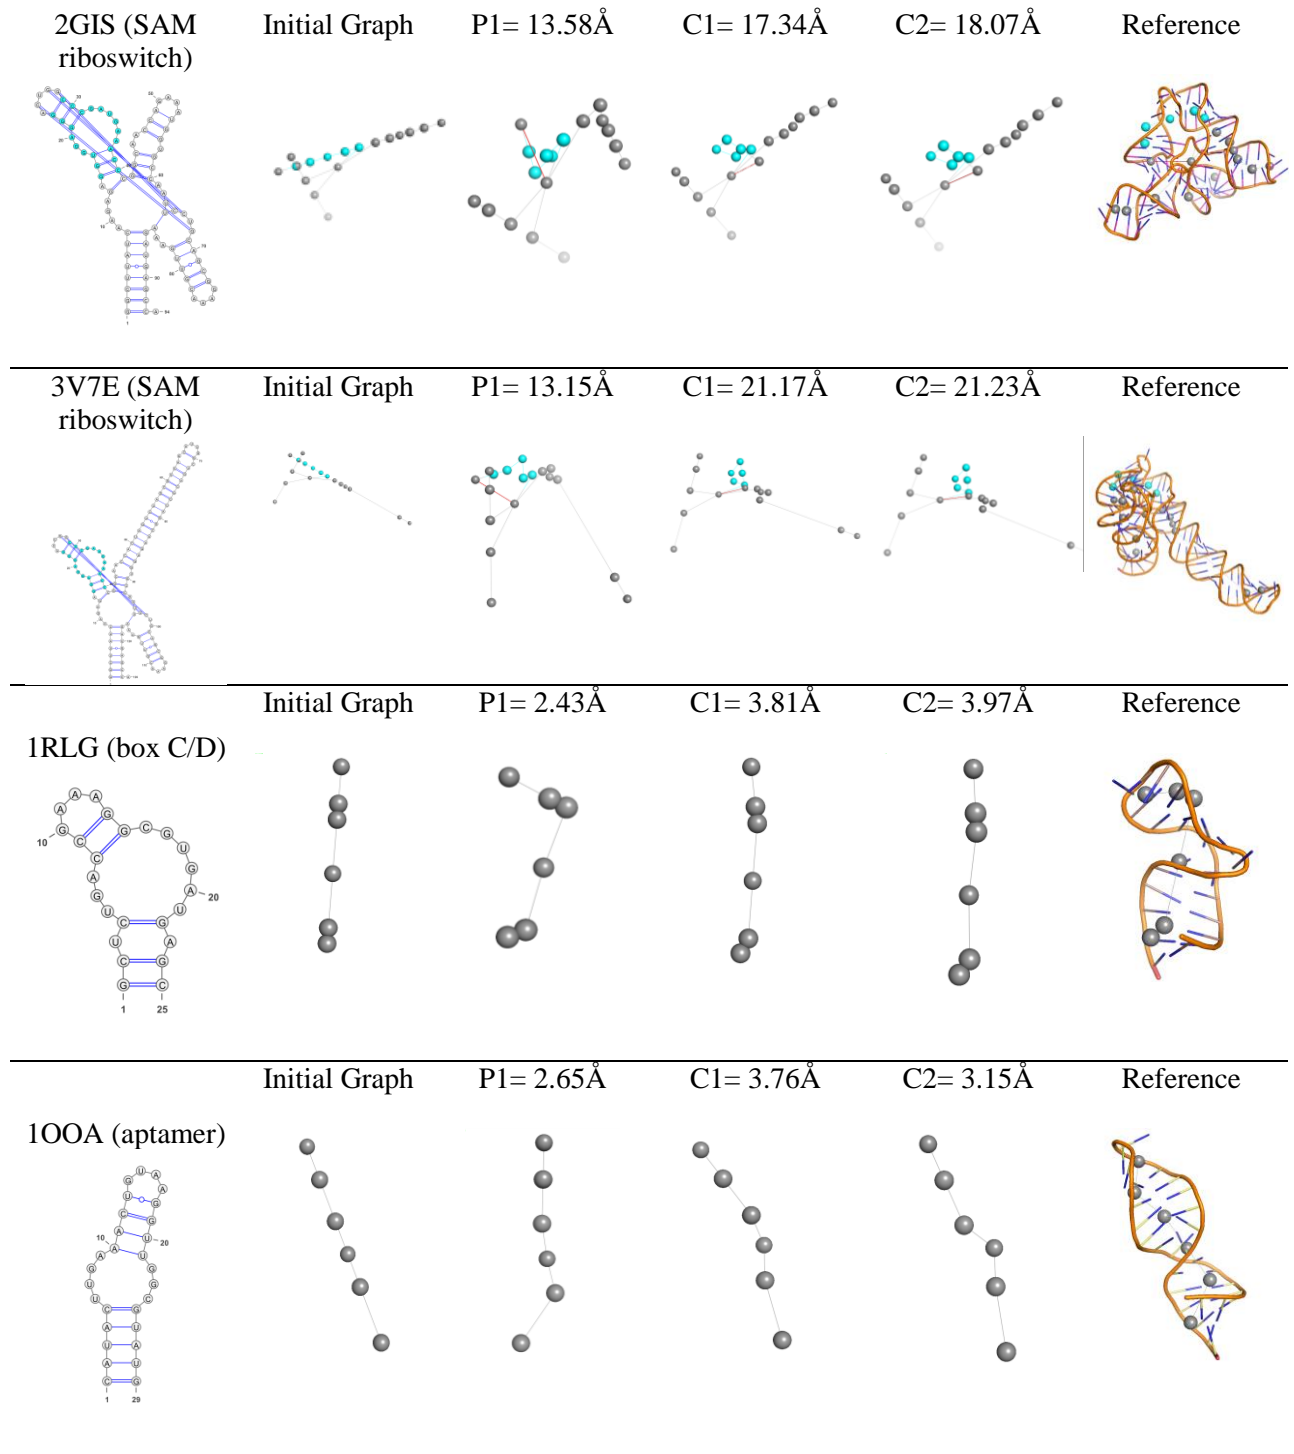



Figure S4

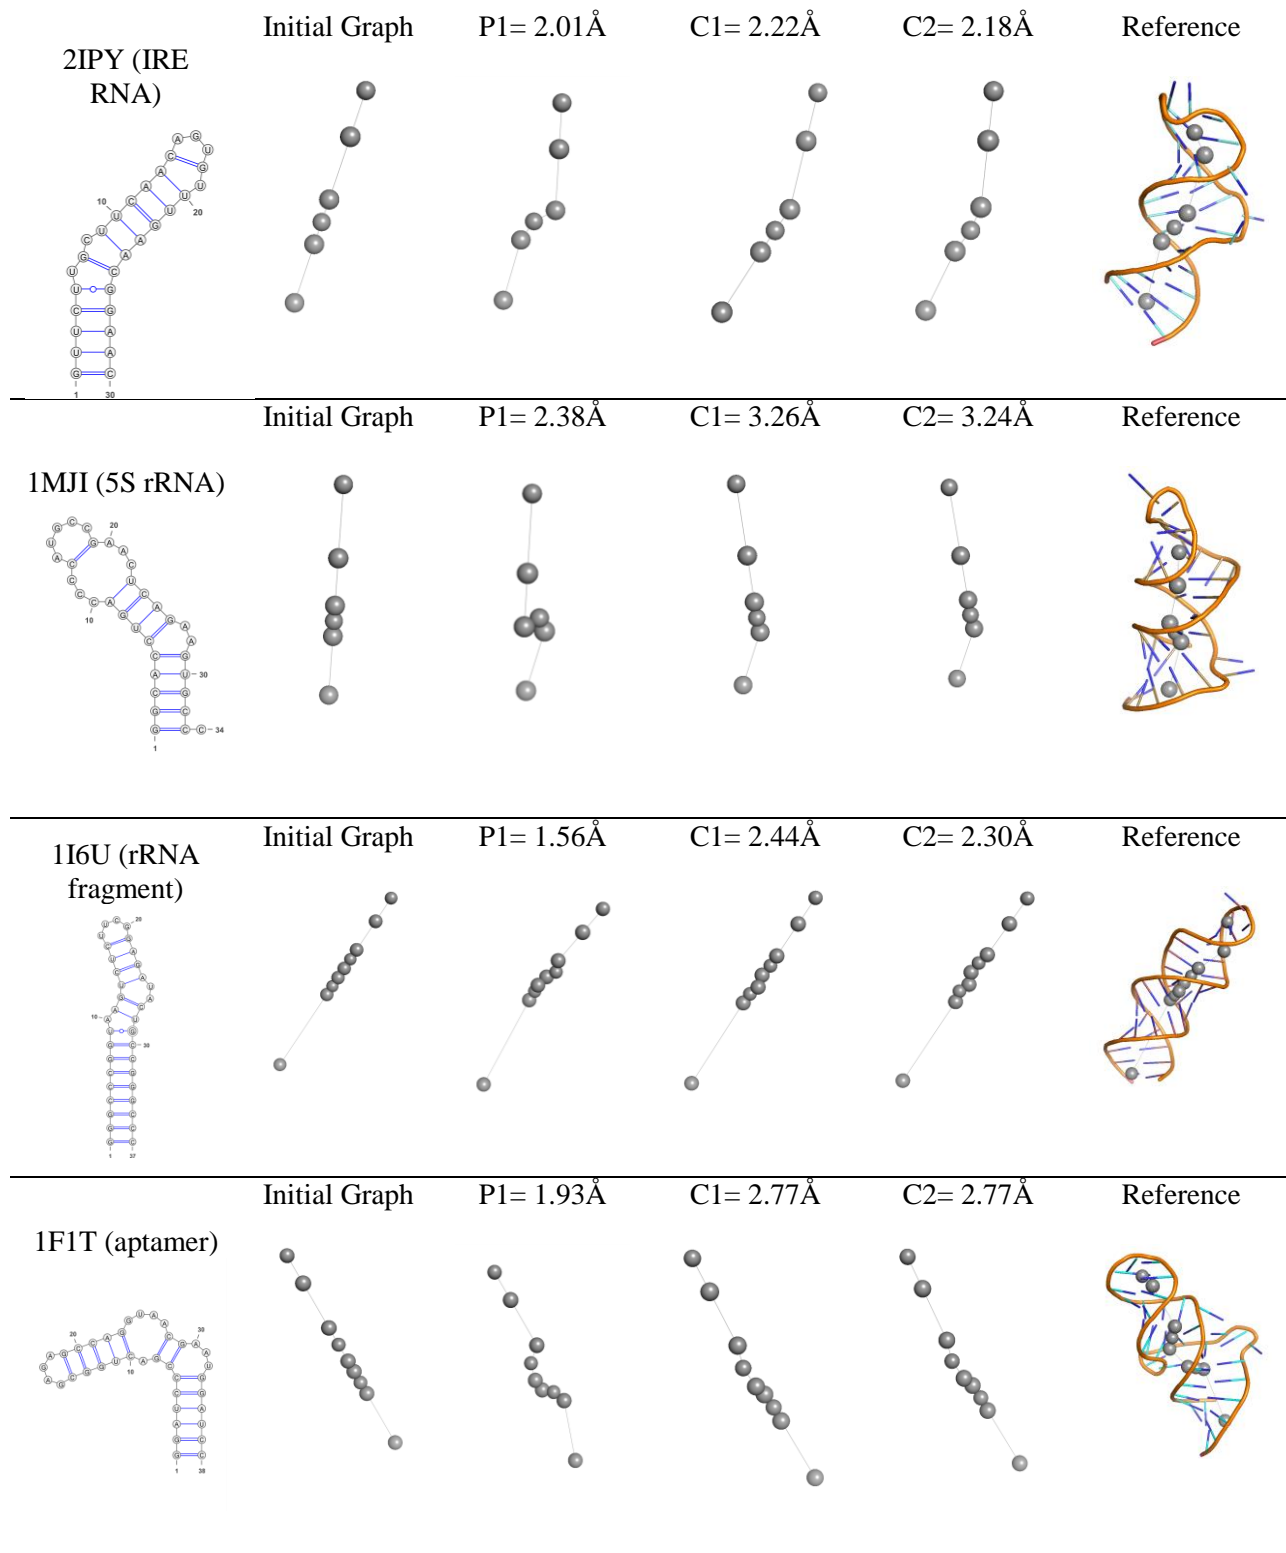

Figure S4

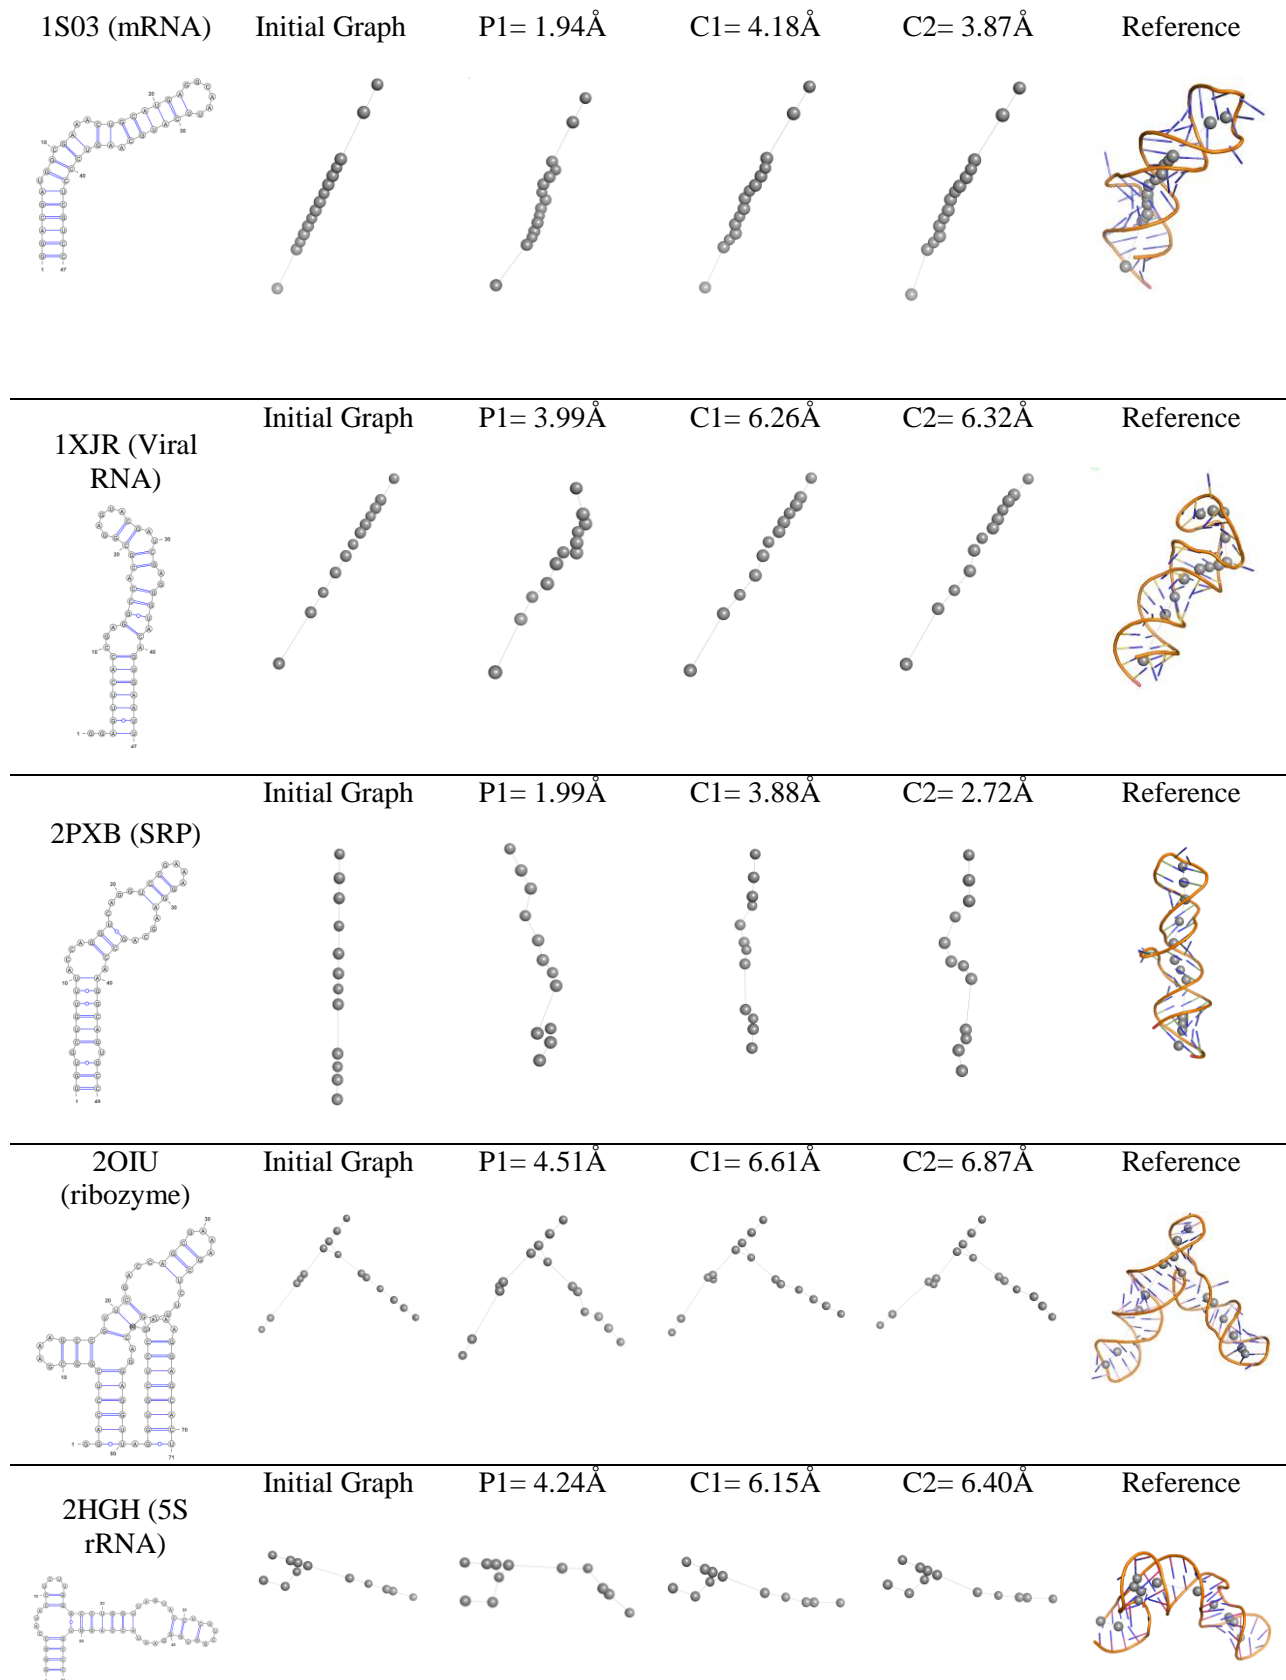

Figure S4

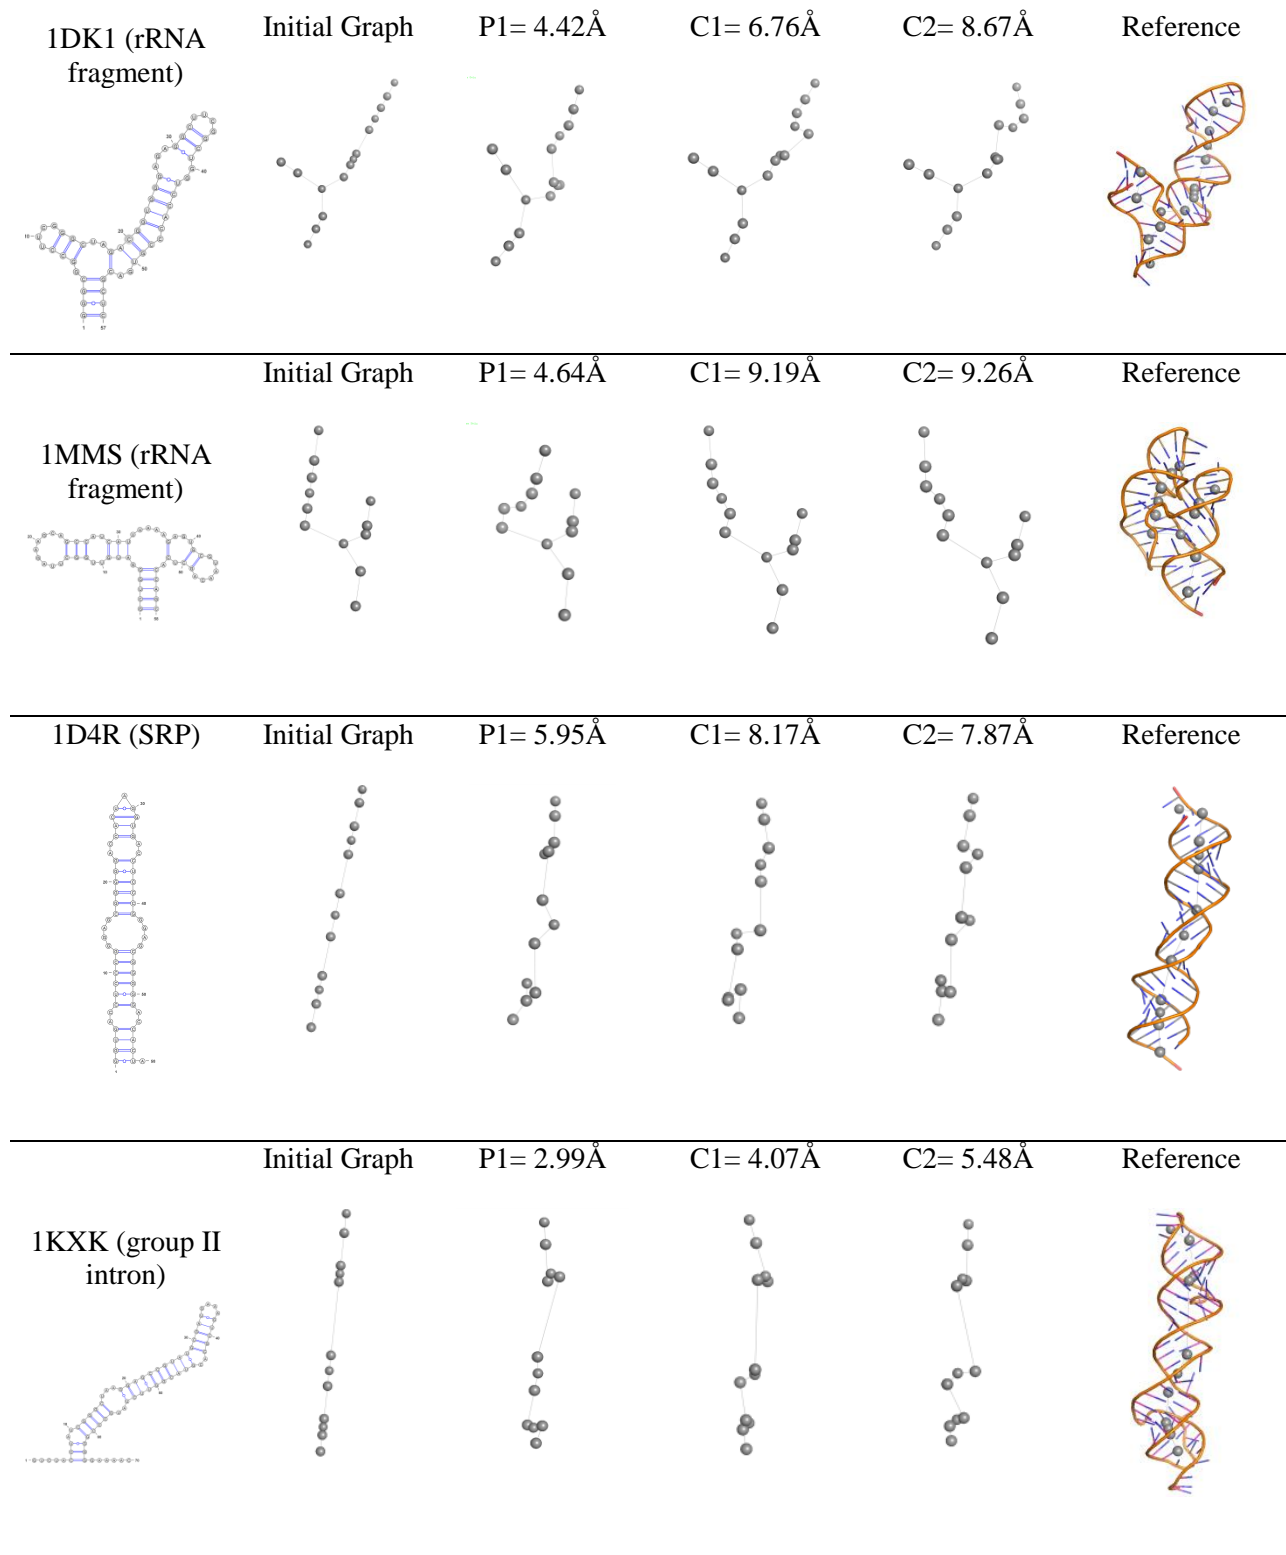

Figure S4

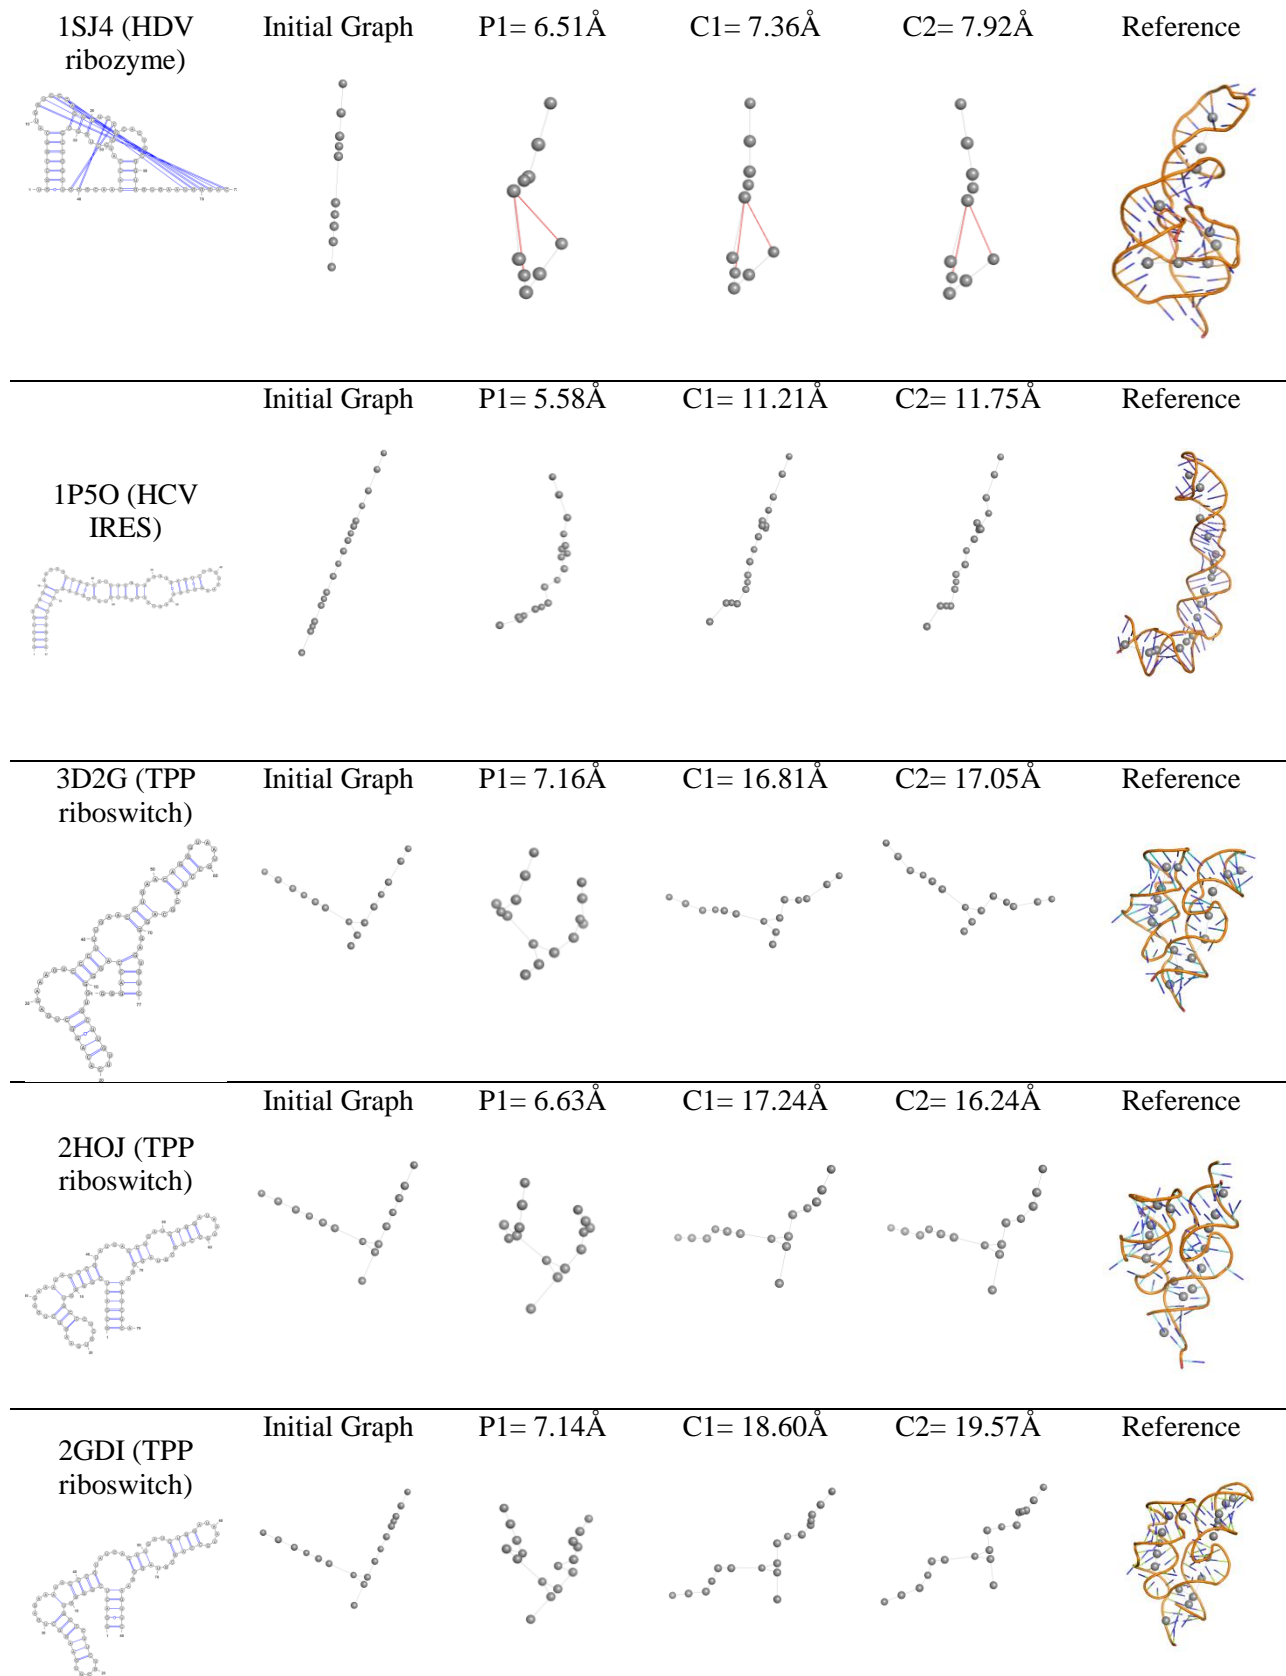

Figure S4

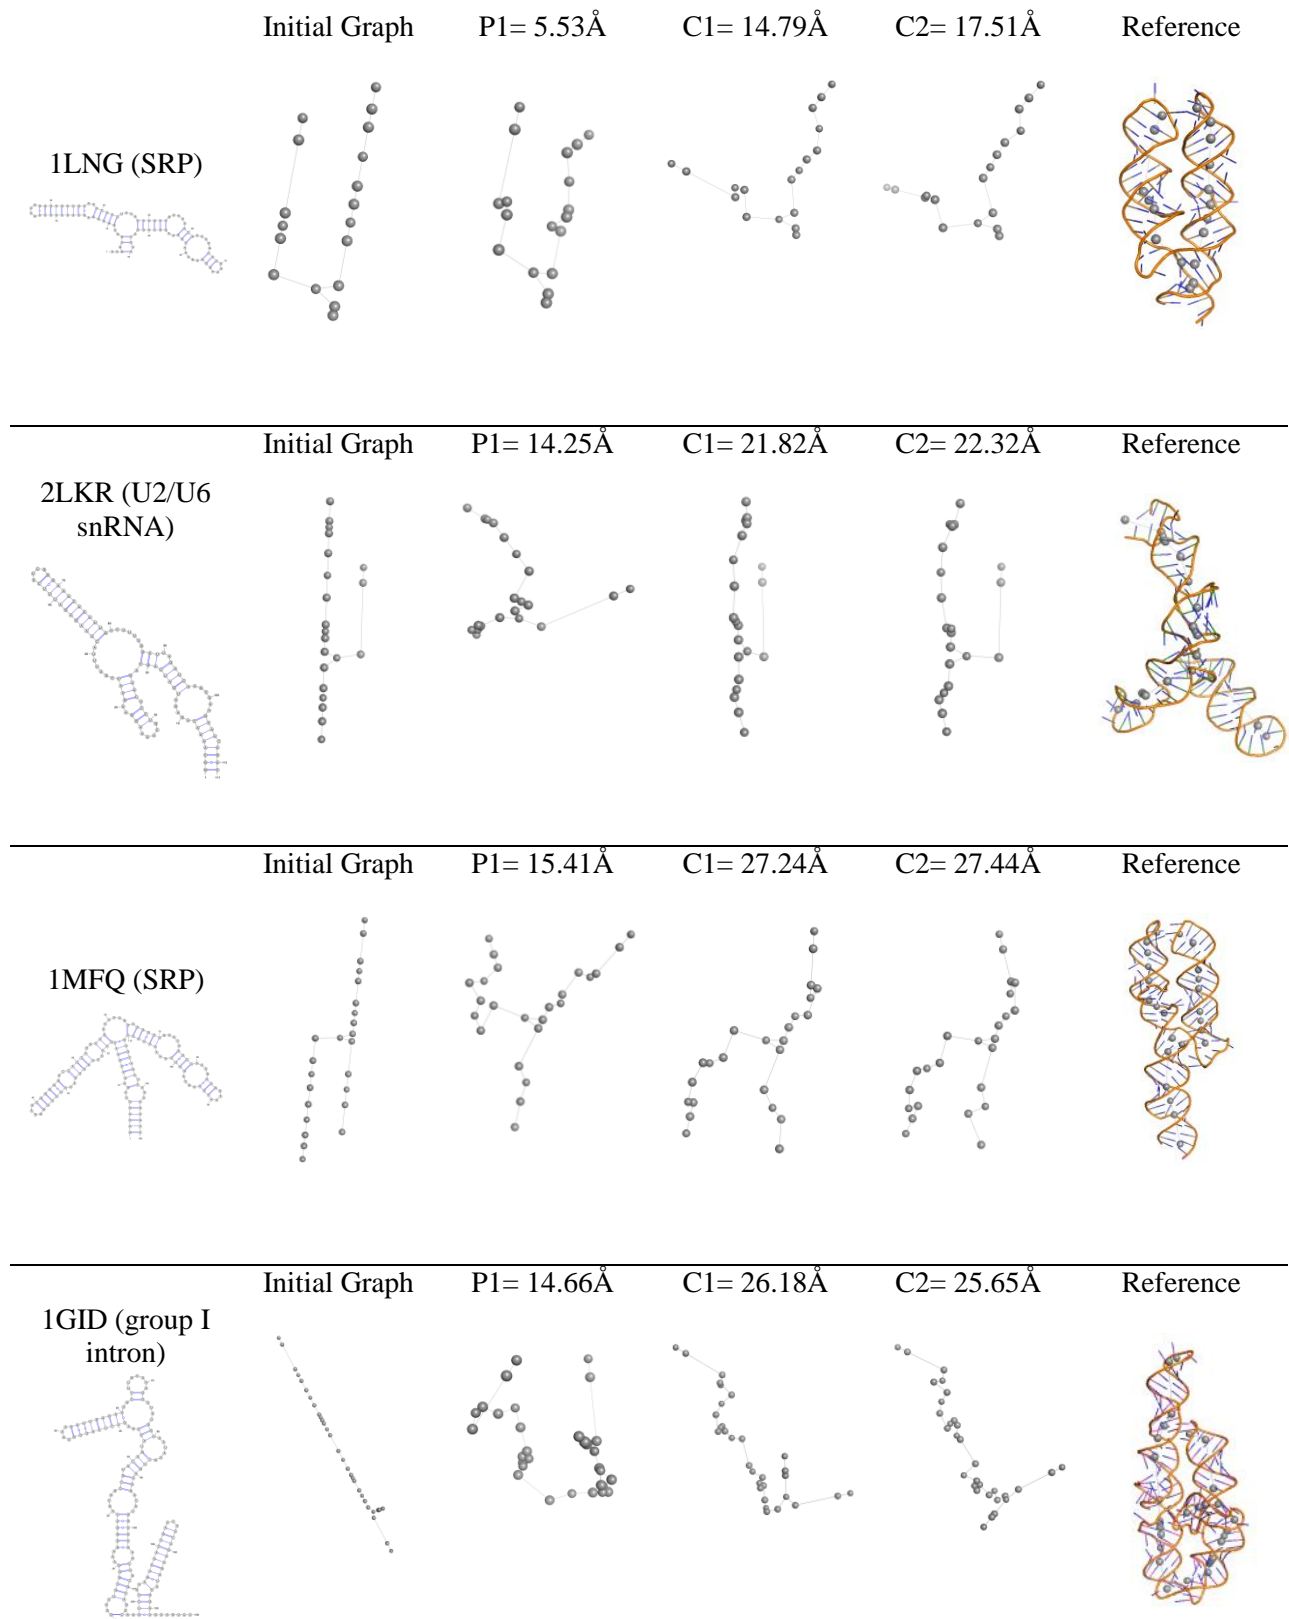

Figure S4. Graph results for 35 RNA structures based on k-turn and non k-turn potentials. The 2D structure is predicted using three 2D structure prediction algorithms (RNAView (4), MC-Annotate (5), and FR3D (6)). The initial graph is predicted based

## Figure S4

on 2D structure. After MC/SA, P1 is the lowest RMSD graph with respect to the reference graph (when the reference is known), C1 is the lowest-scored graph, and C2 is the last accepted graph conformation. K-turn regions are indicated by cyan. Pseudoknot edges are shown in red.

Figure S5

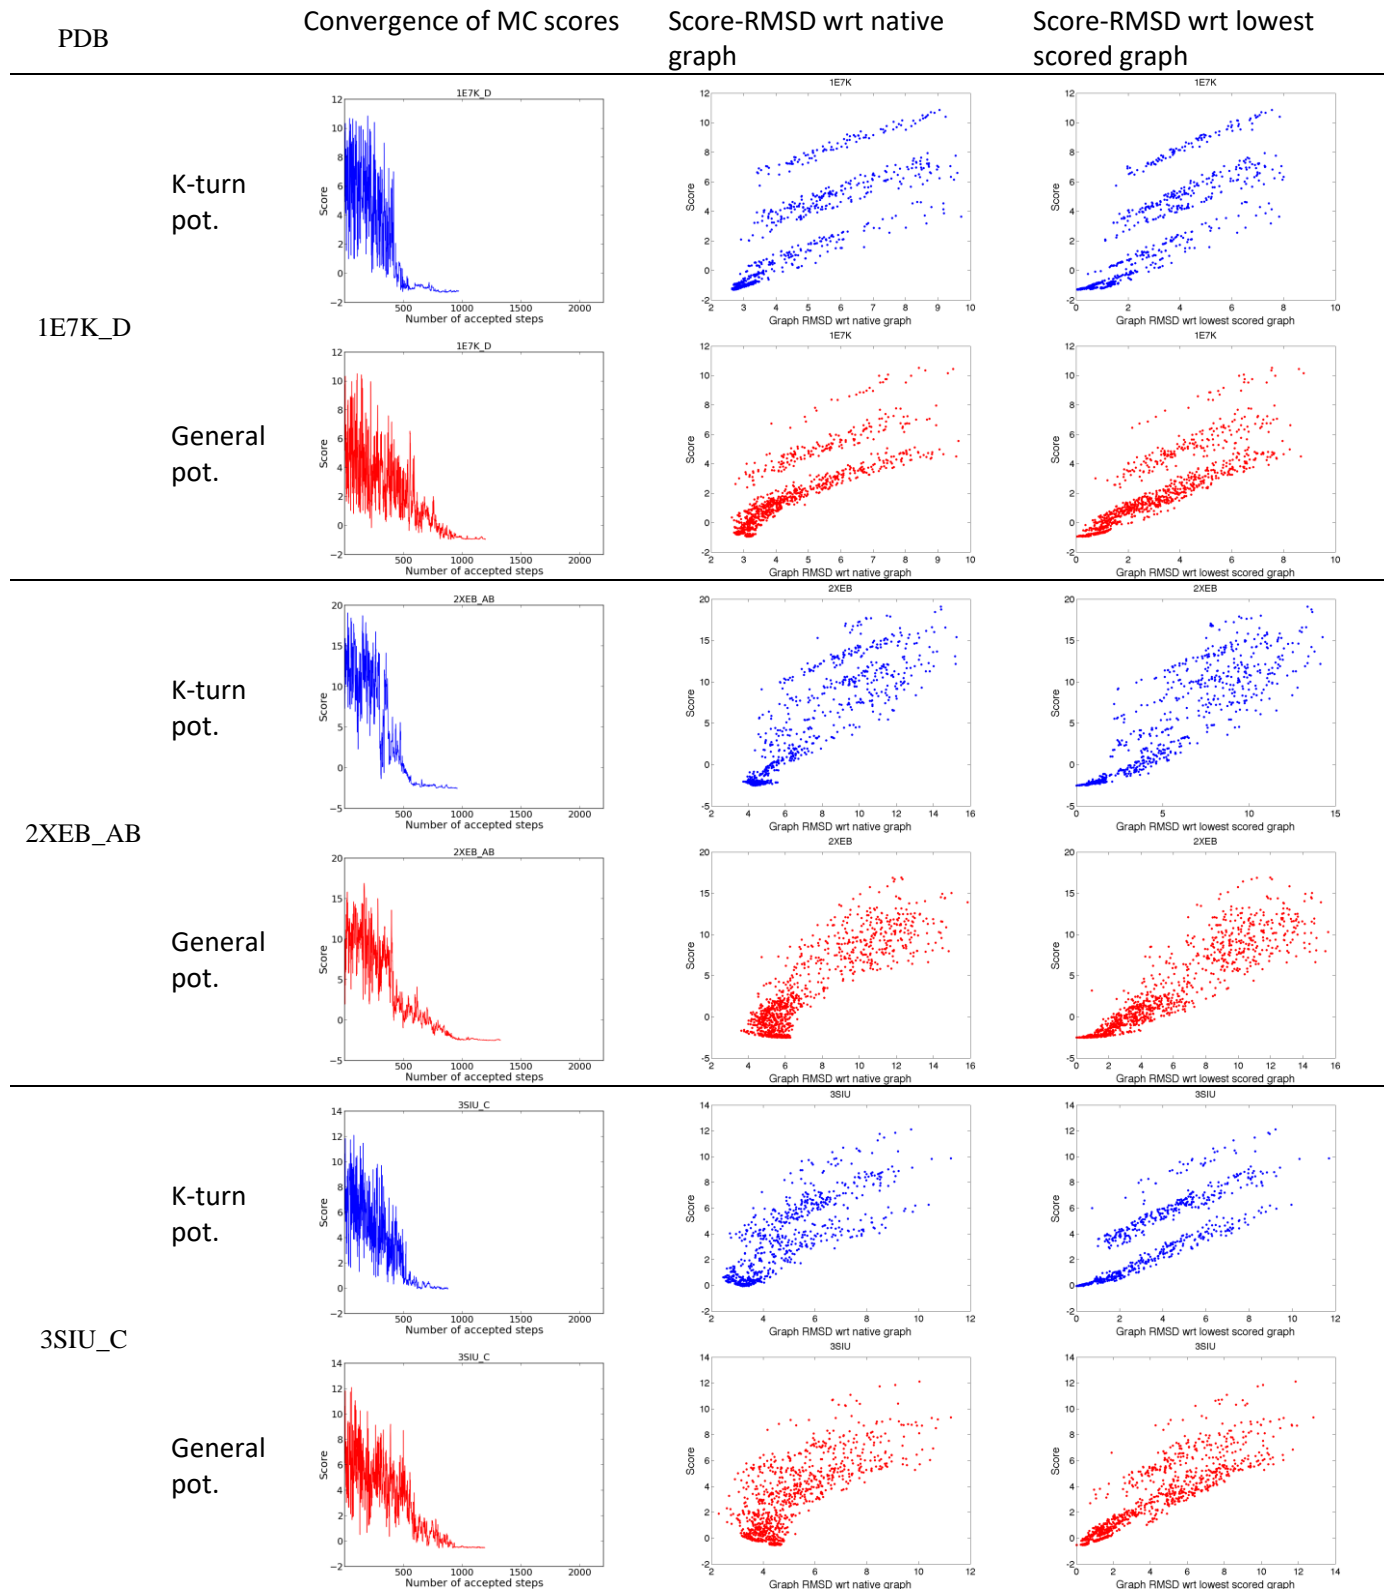

Figure S5

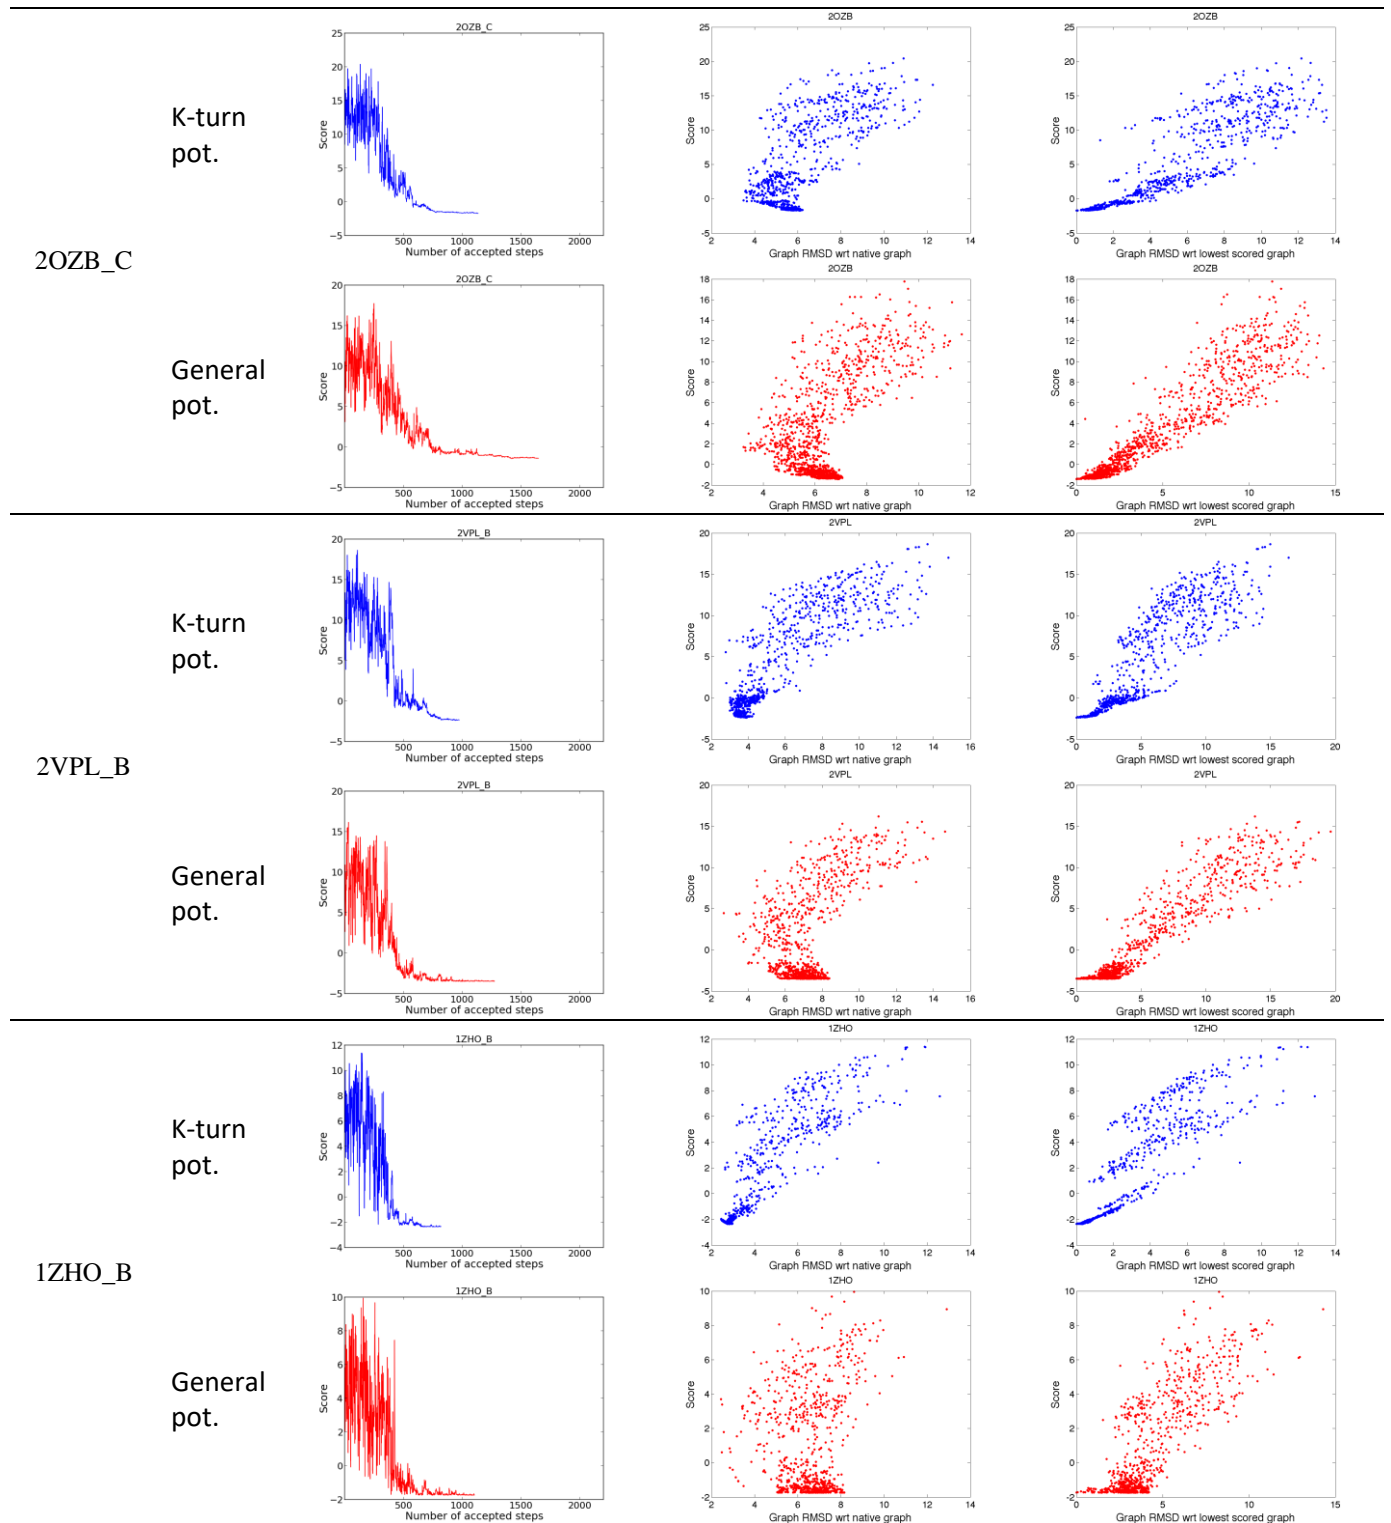



Figure S5

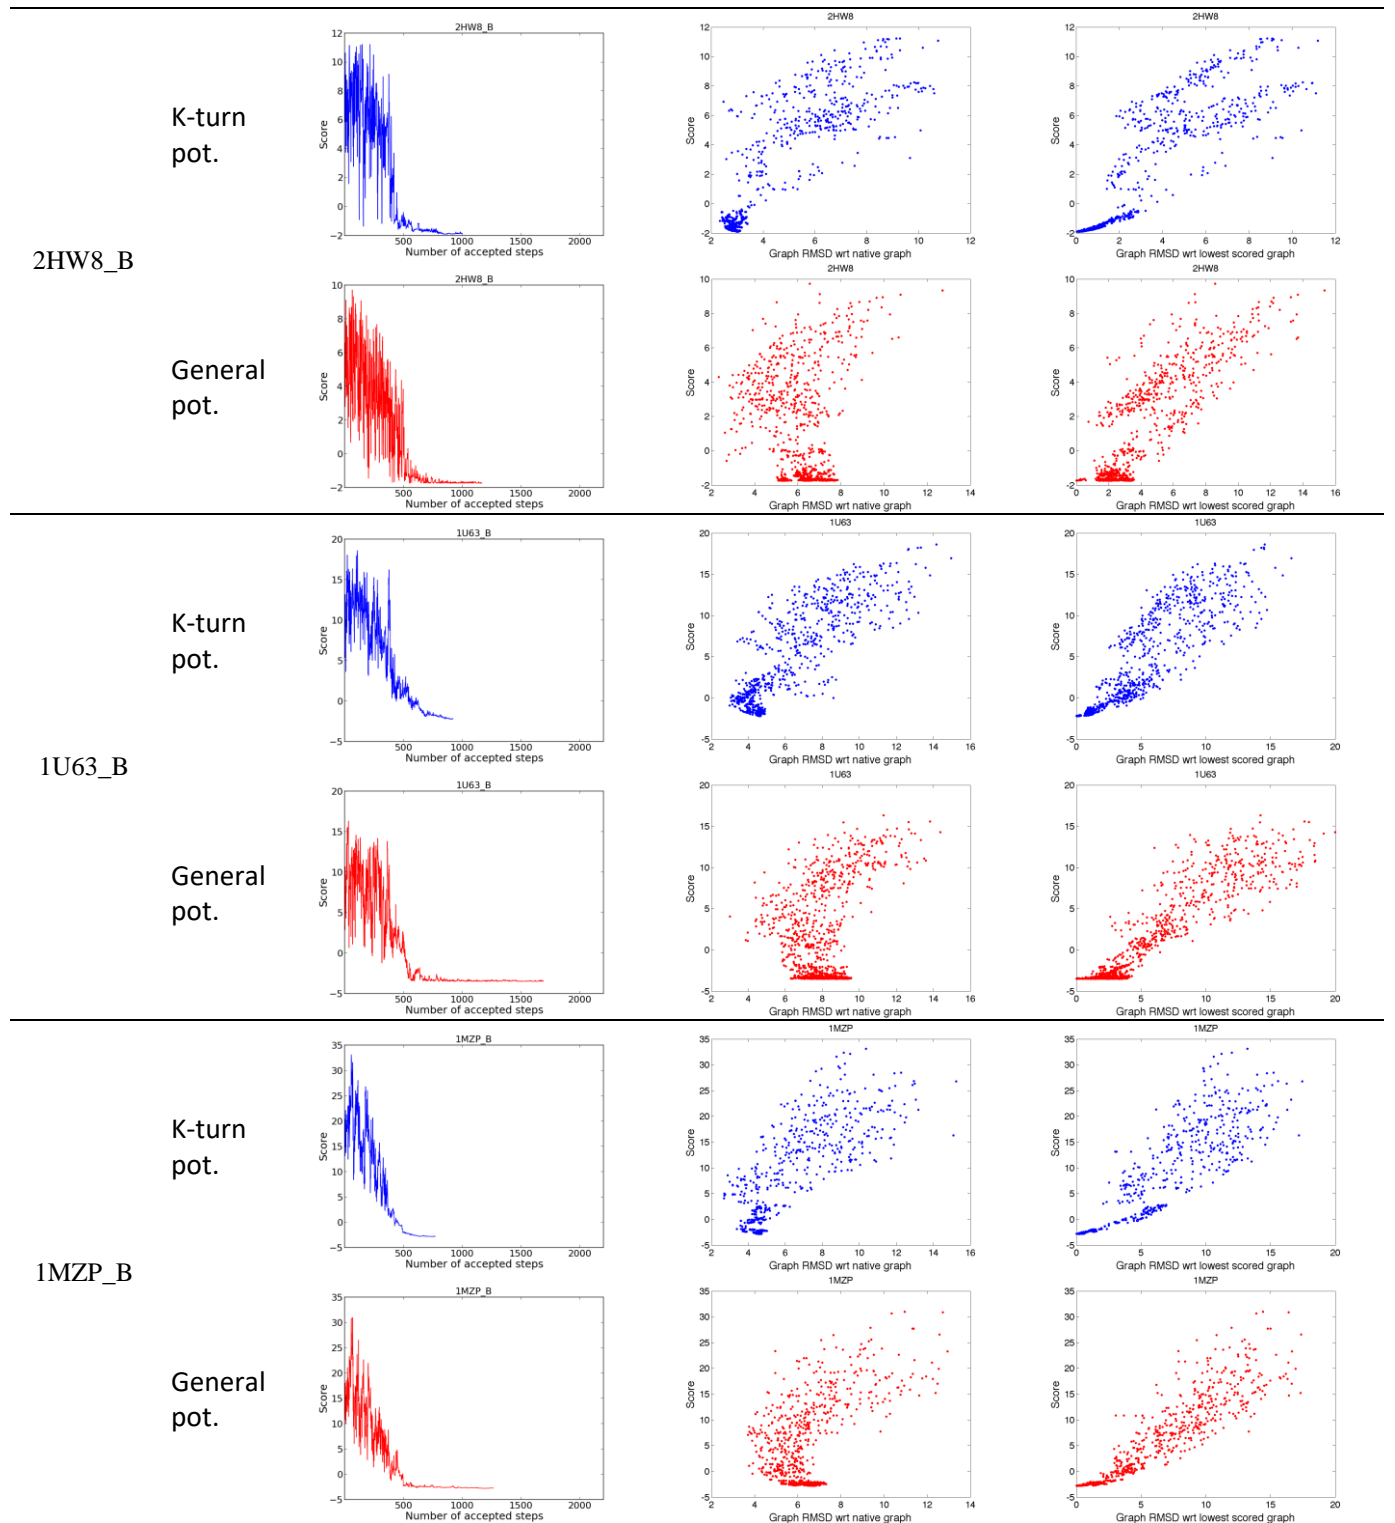

Figure S5

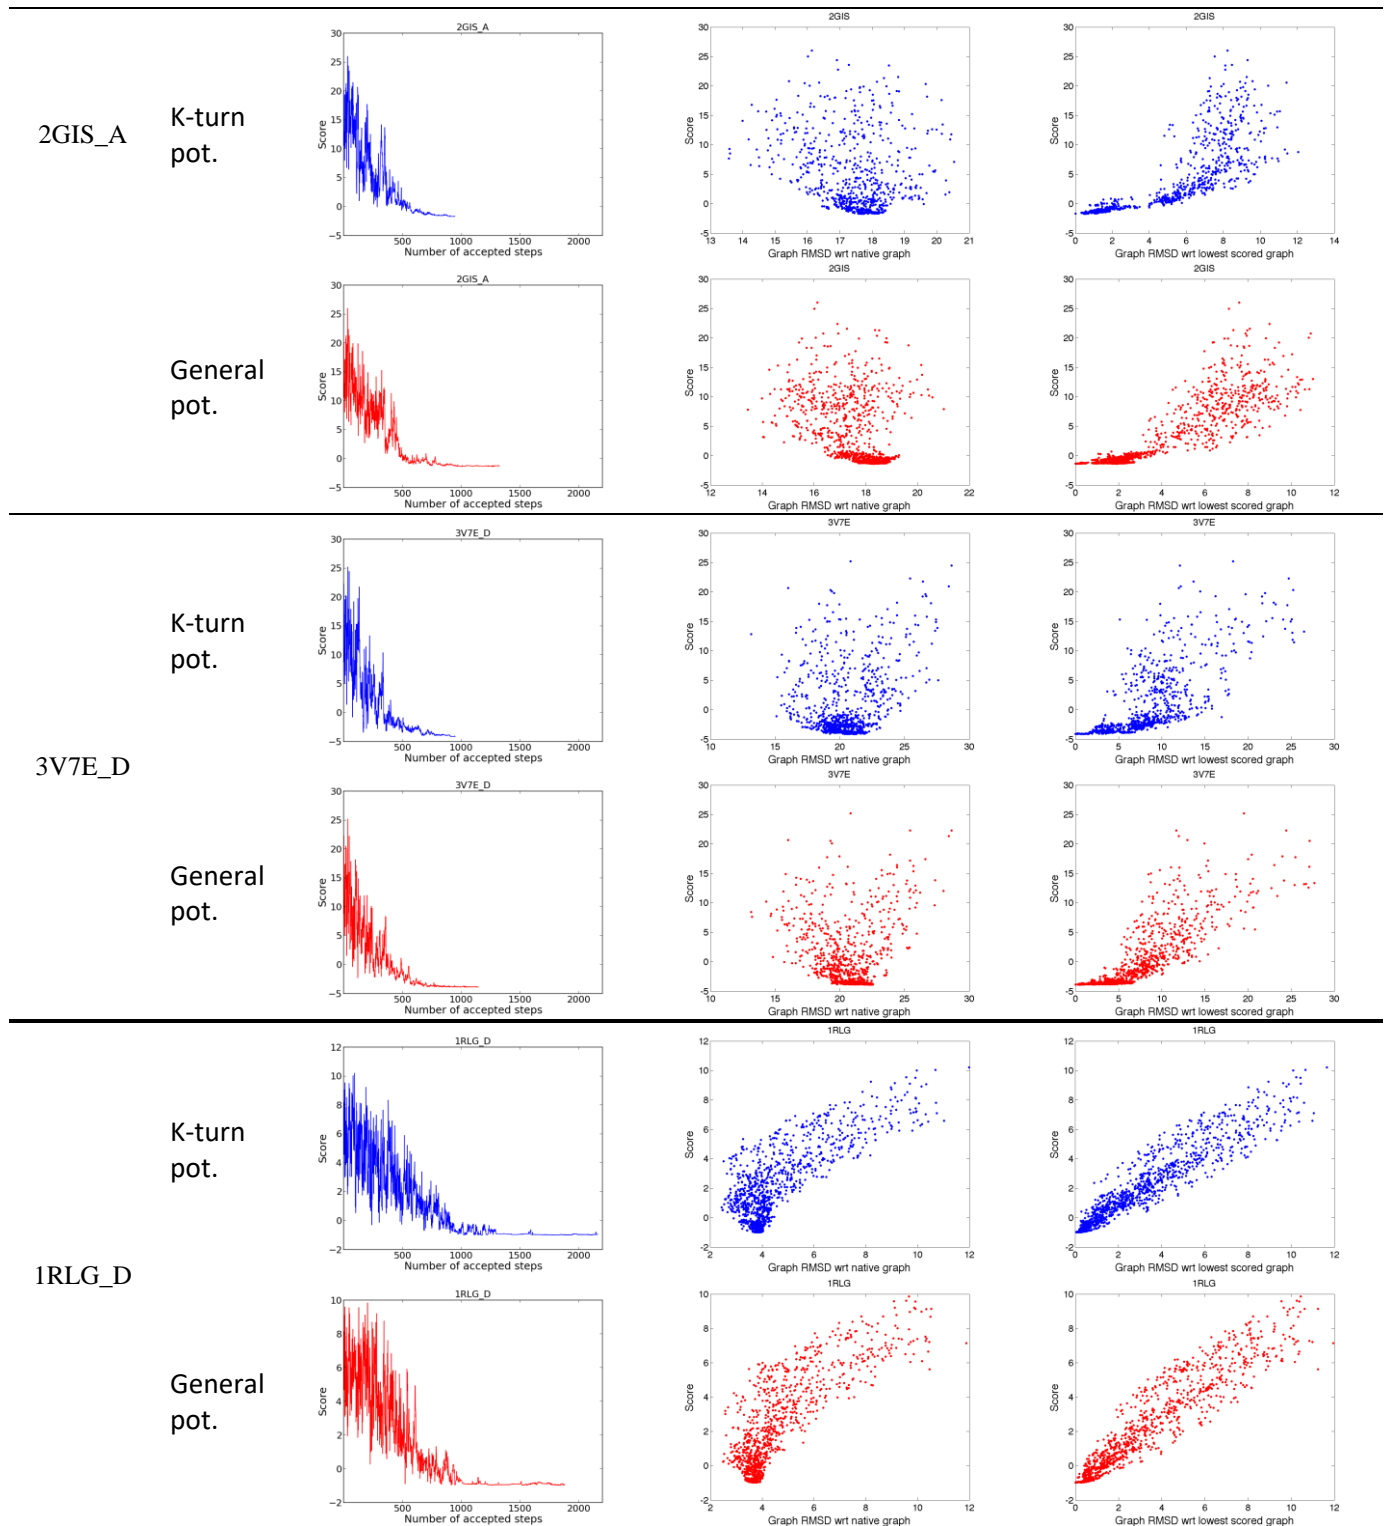

Figure S5

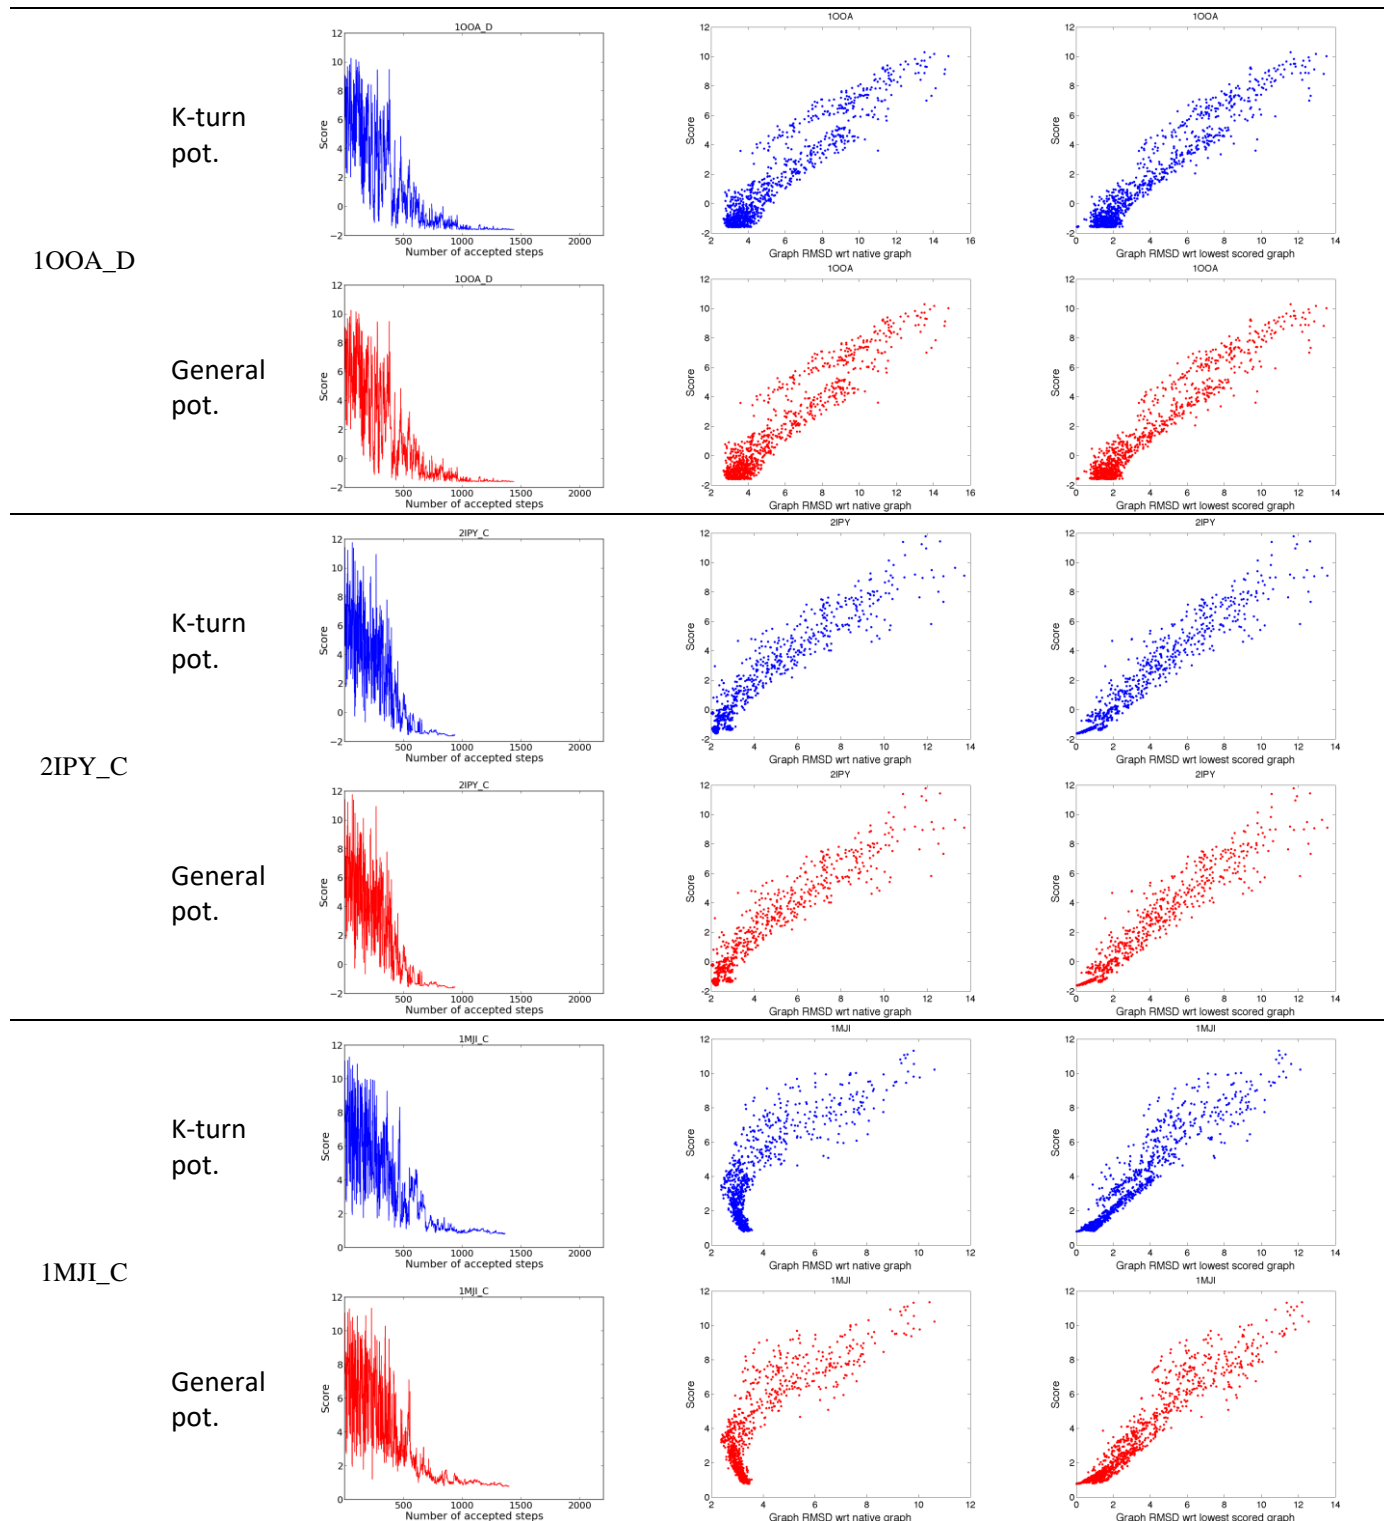

Figure S5

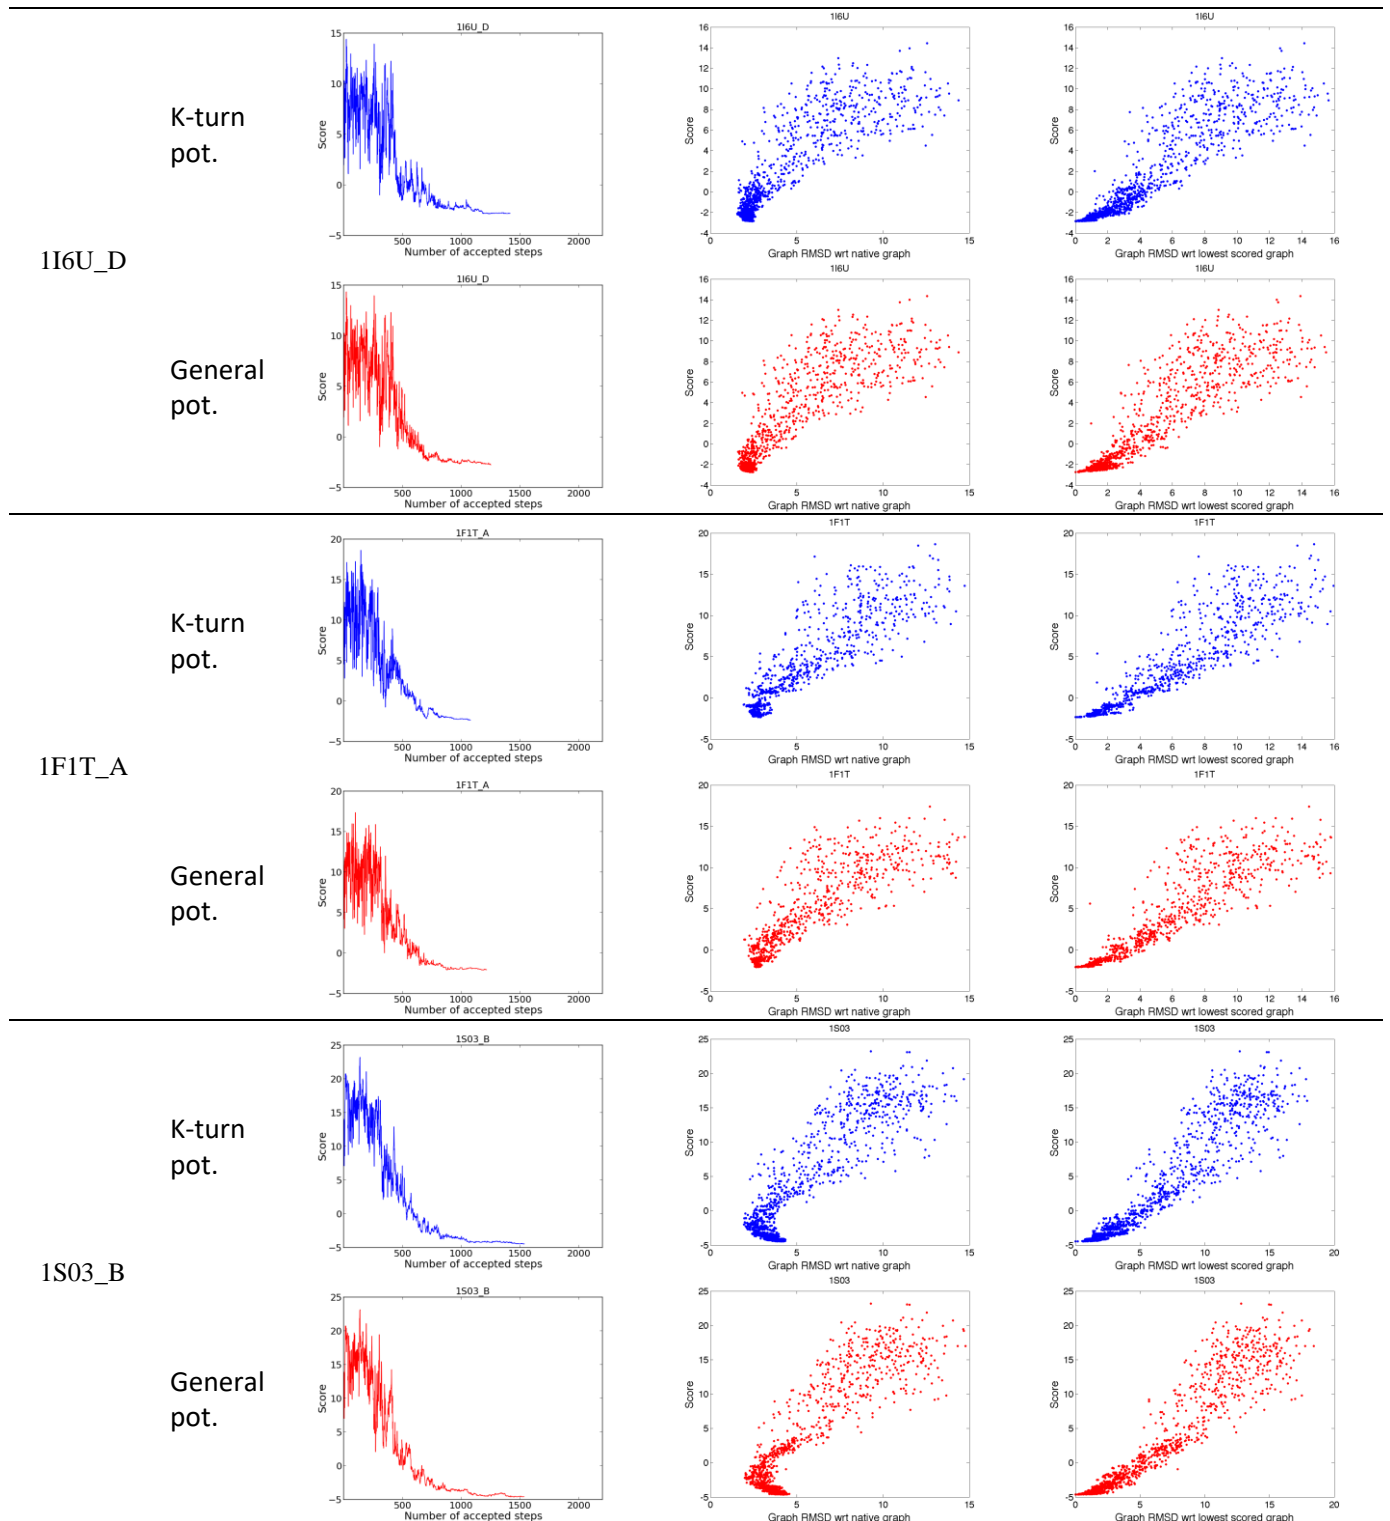

Figure S5

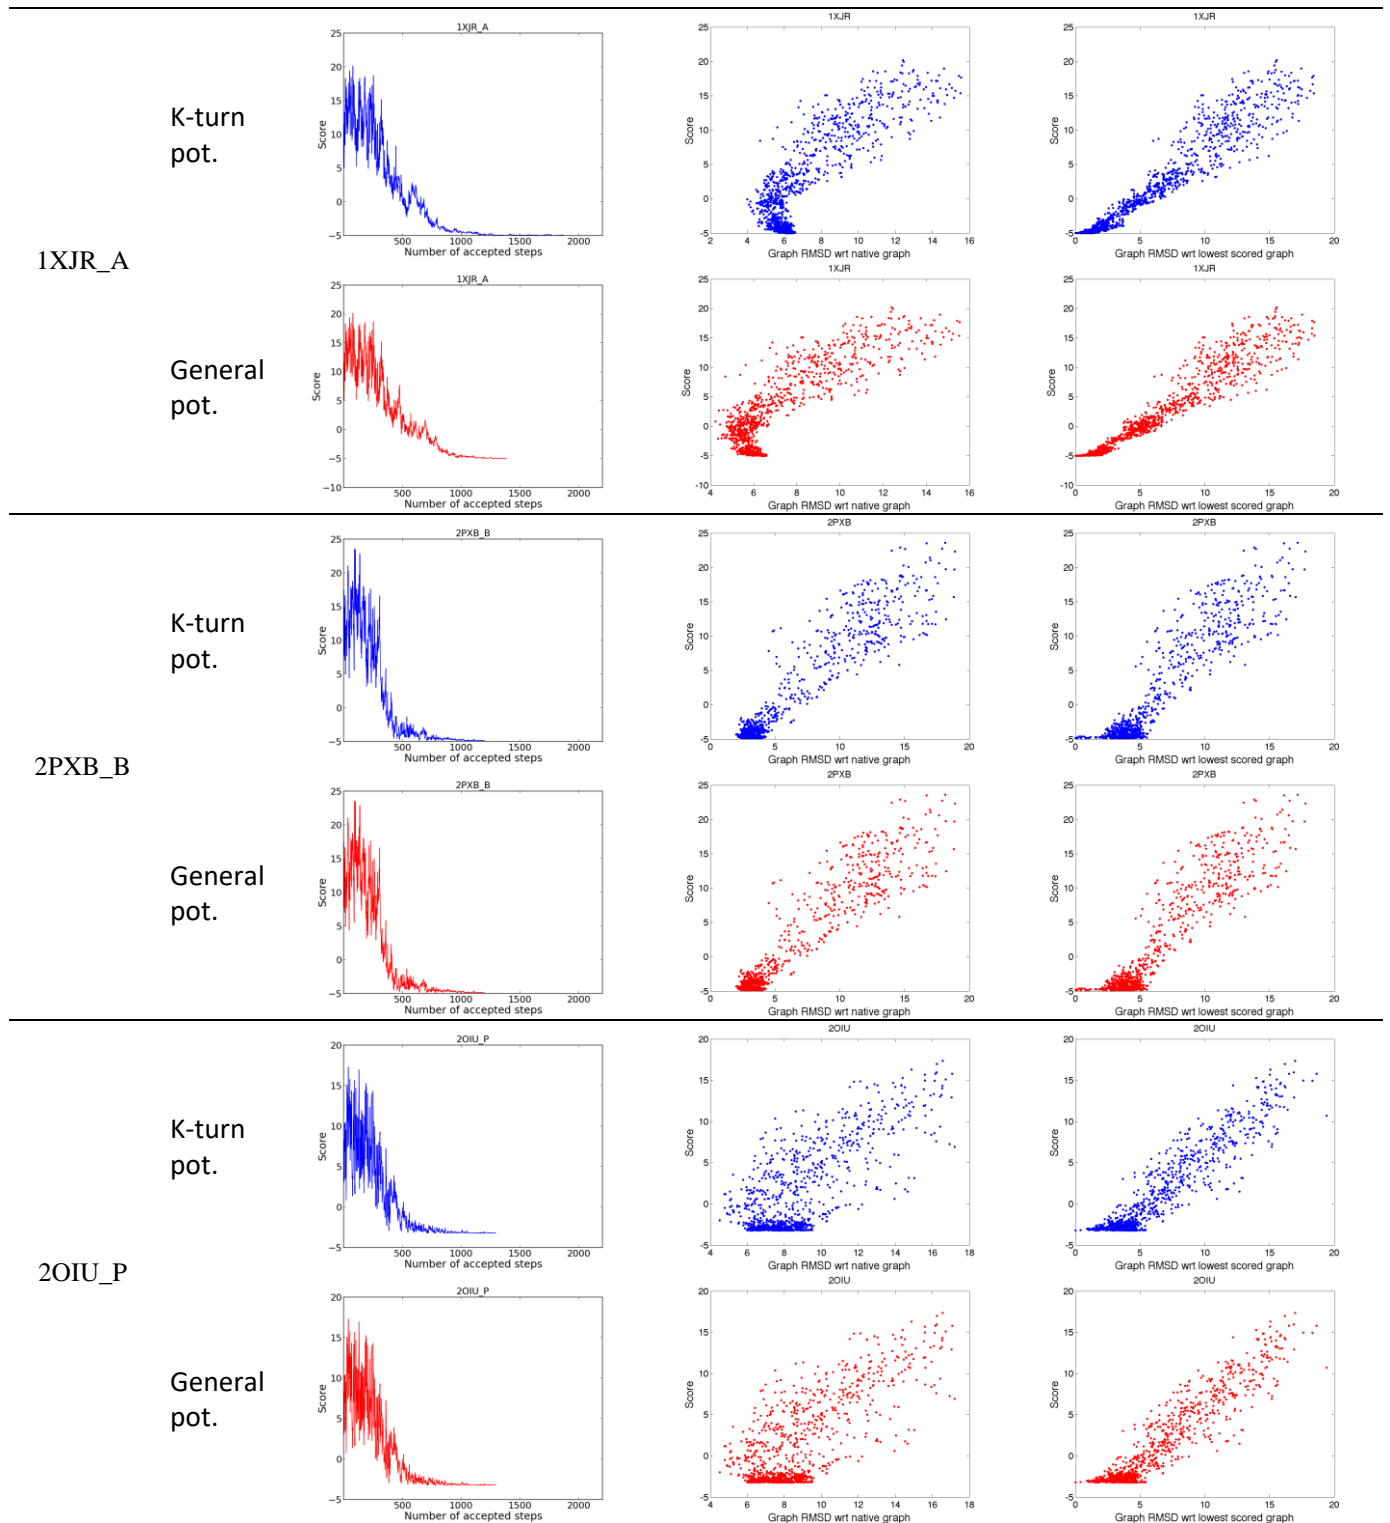

Figure S5

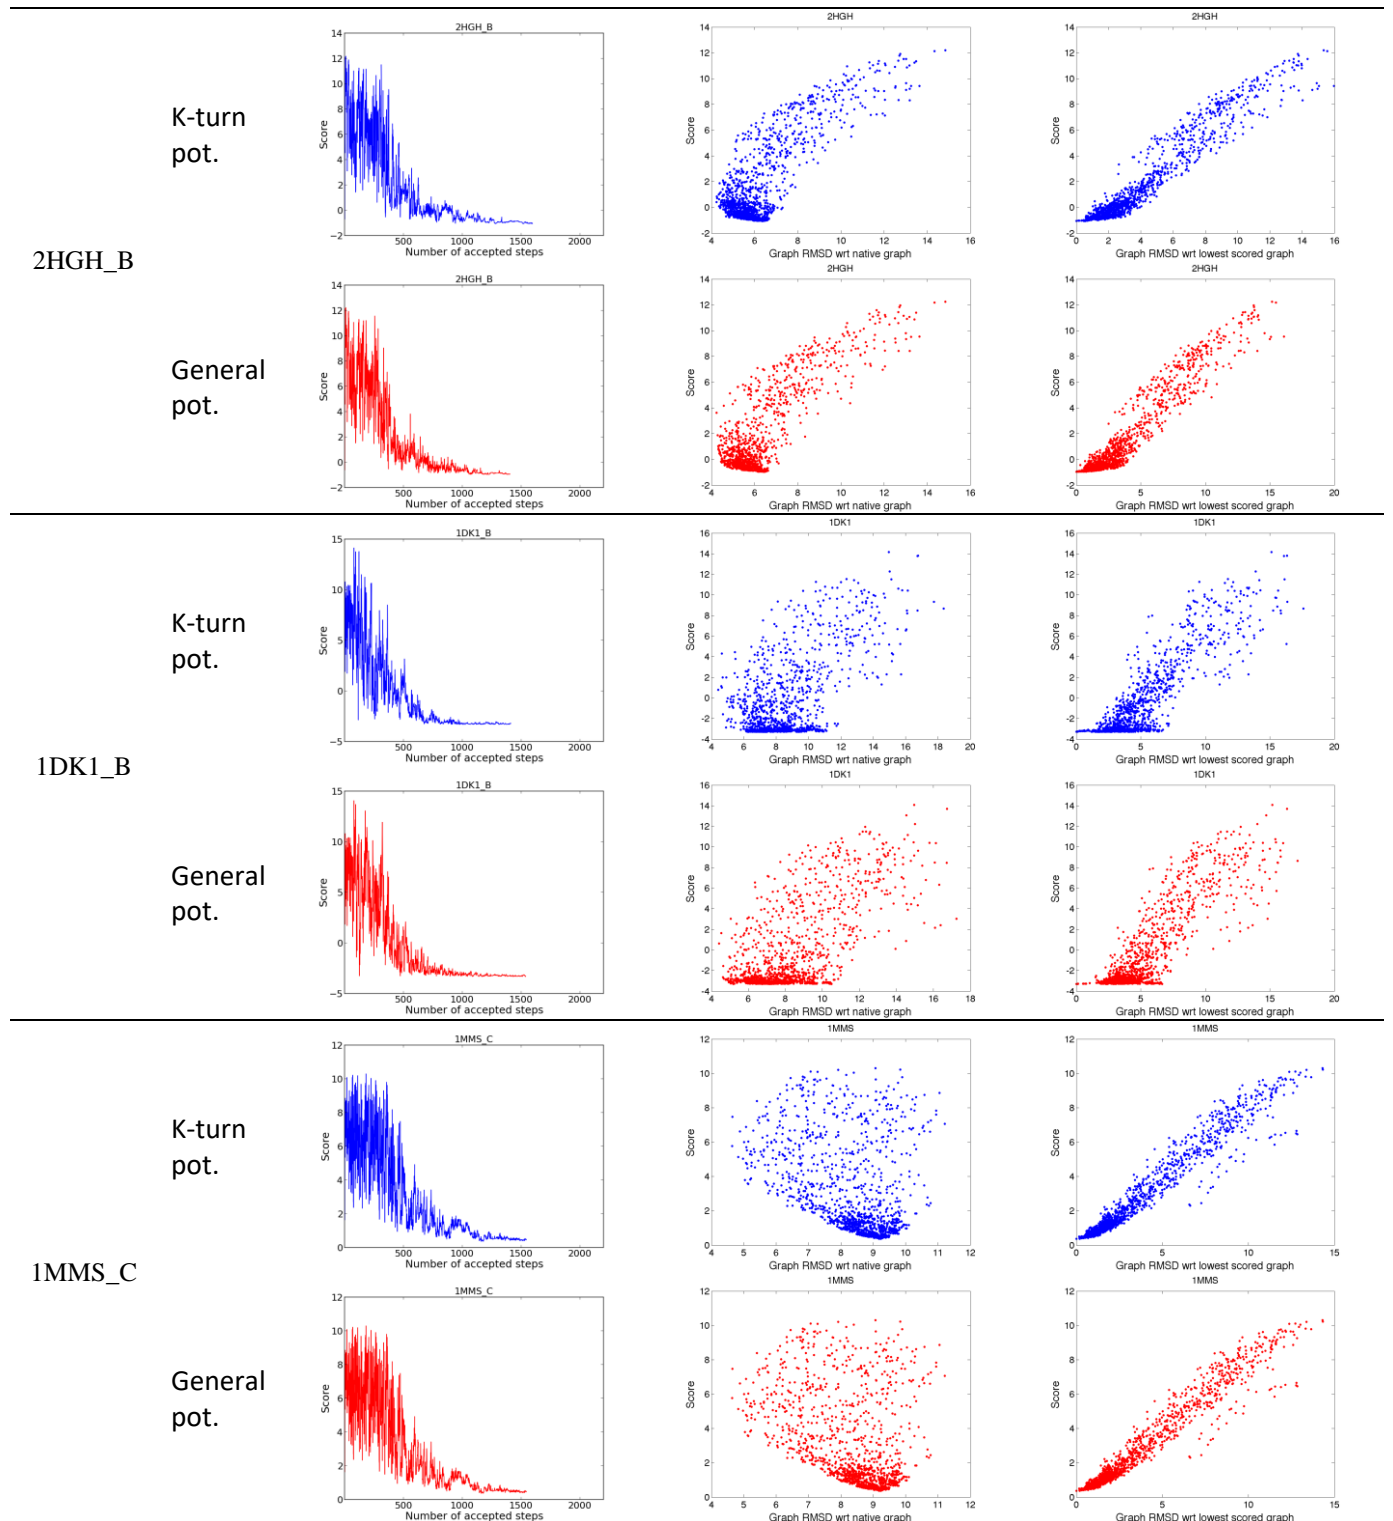

Figure S5

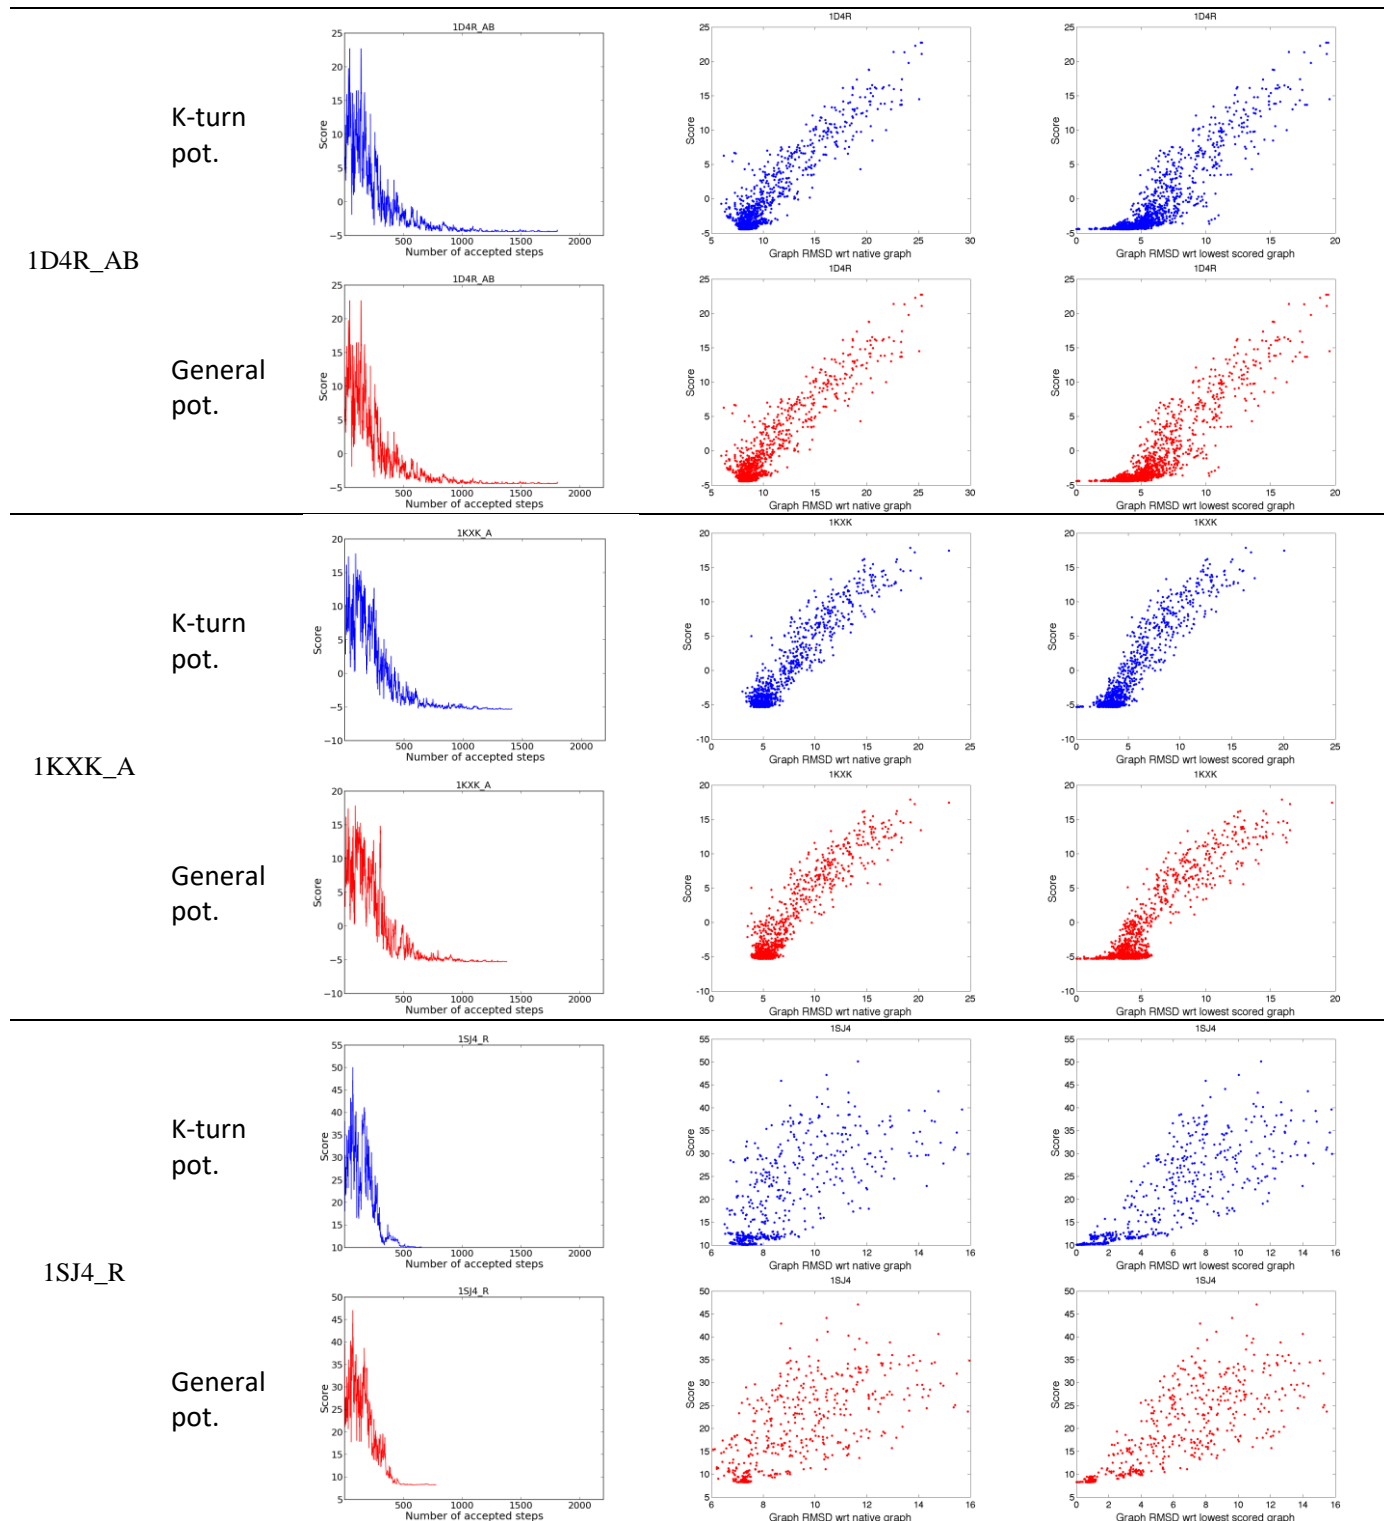

Figure S5

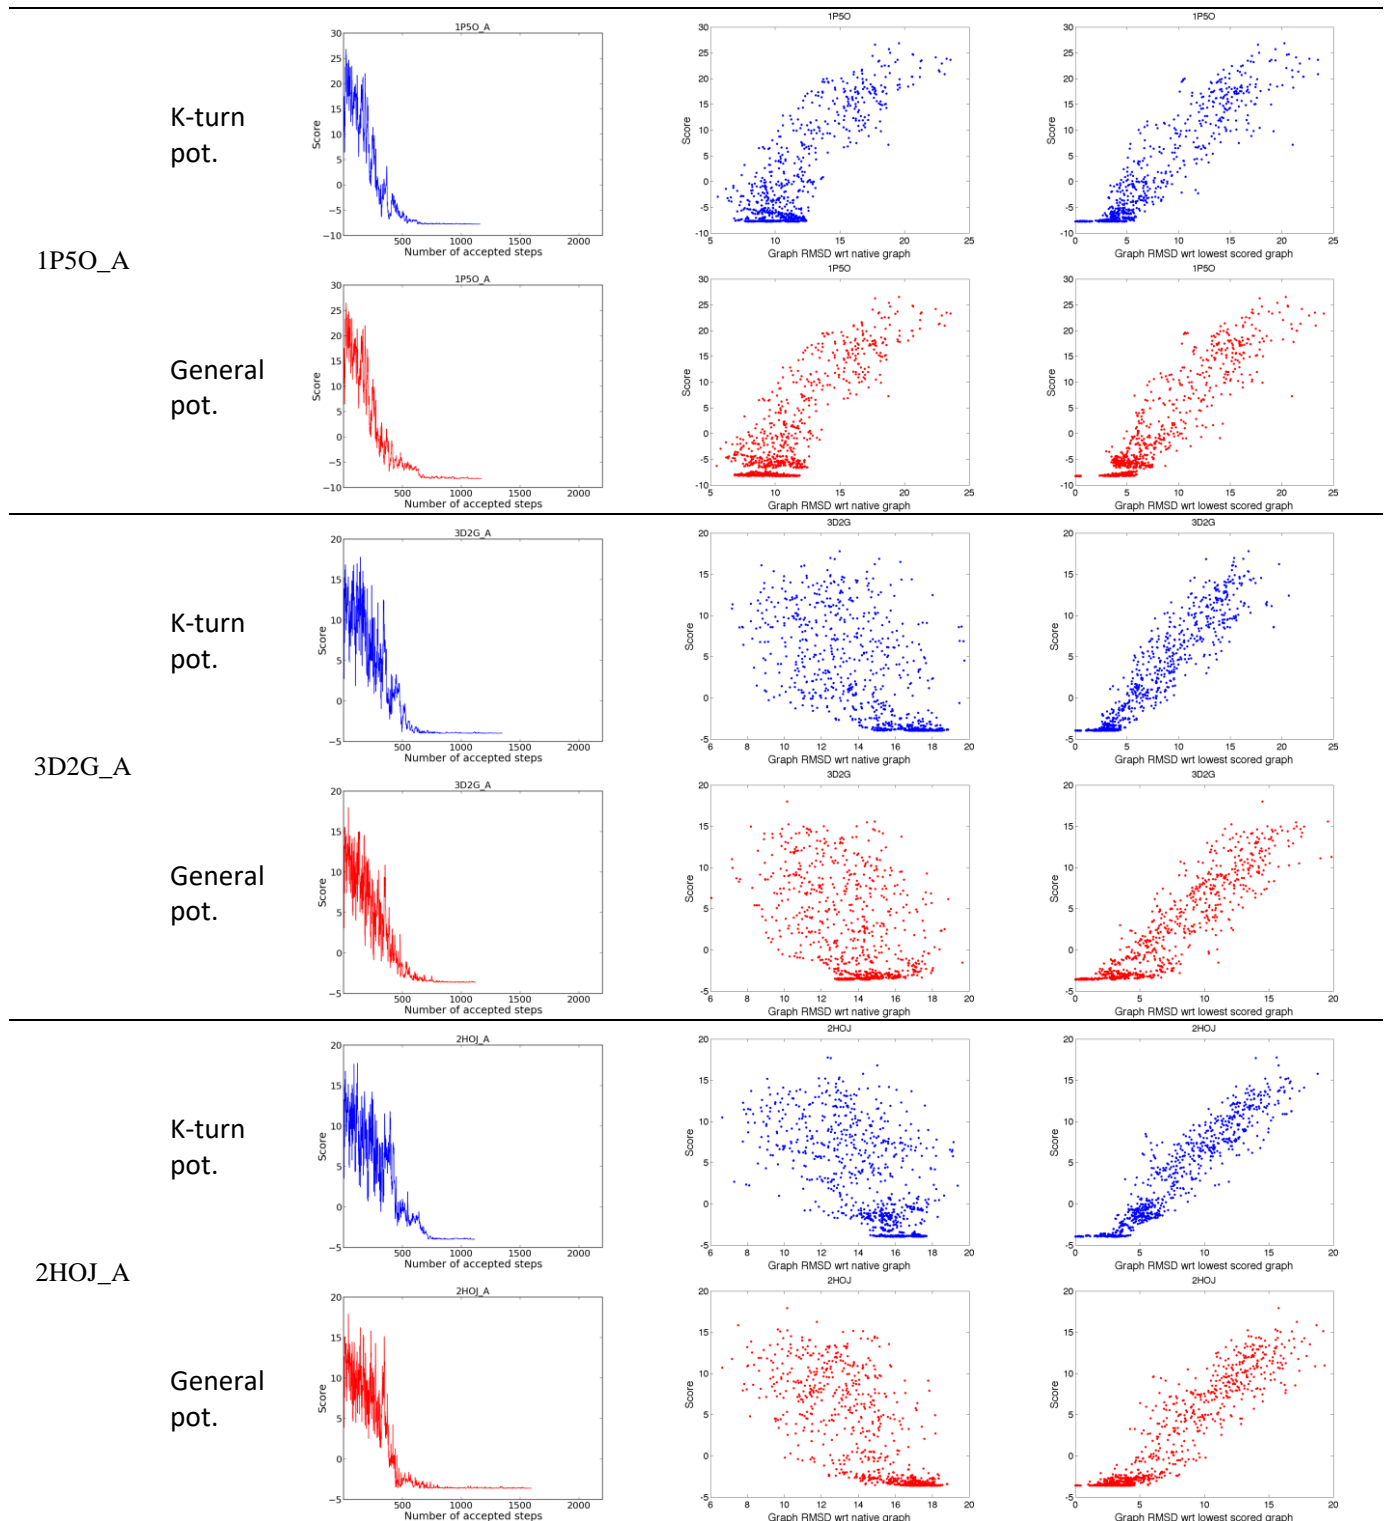



Figure S5

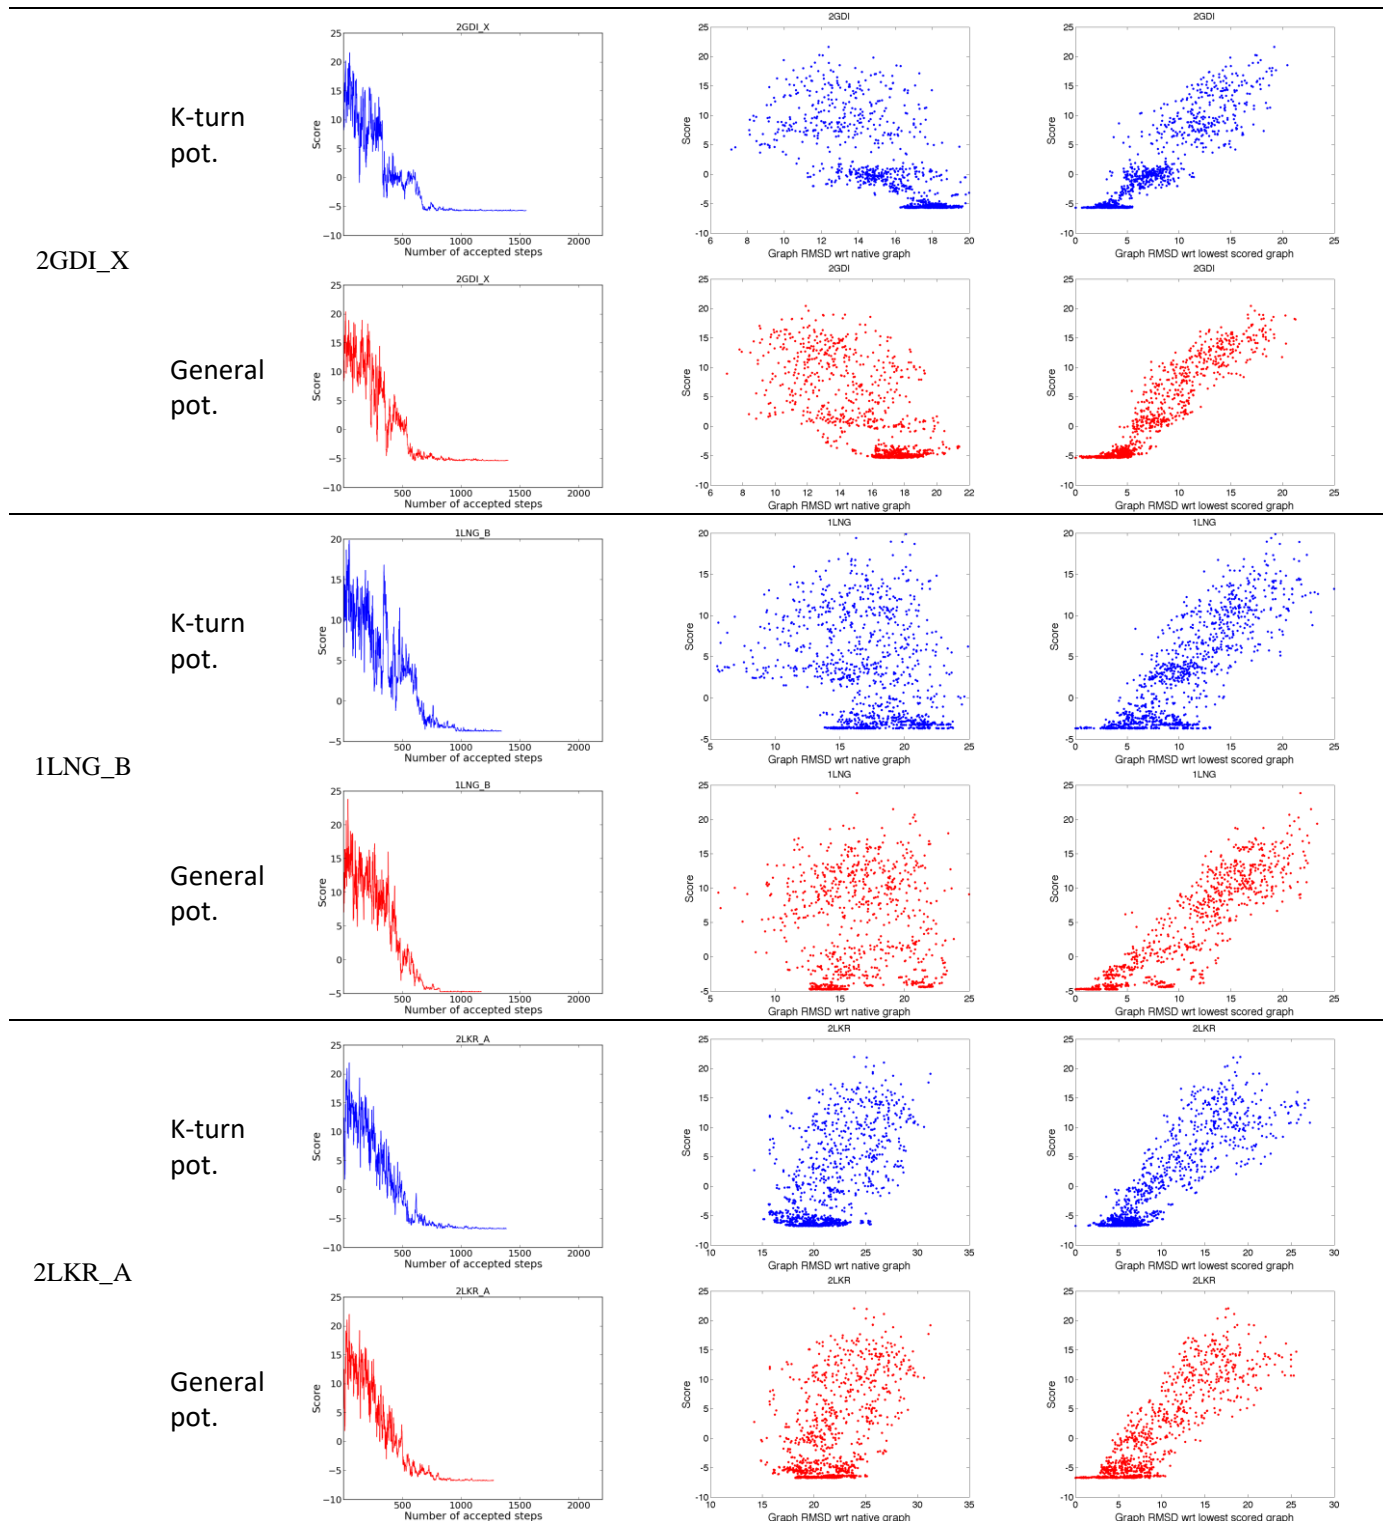

Figure S5

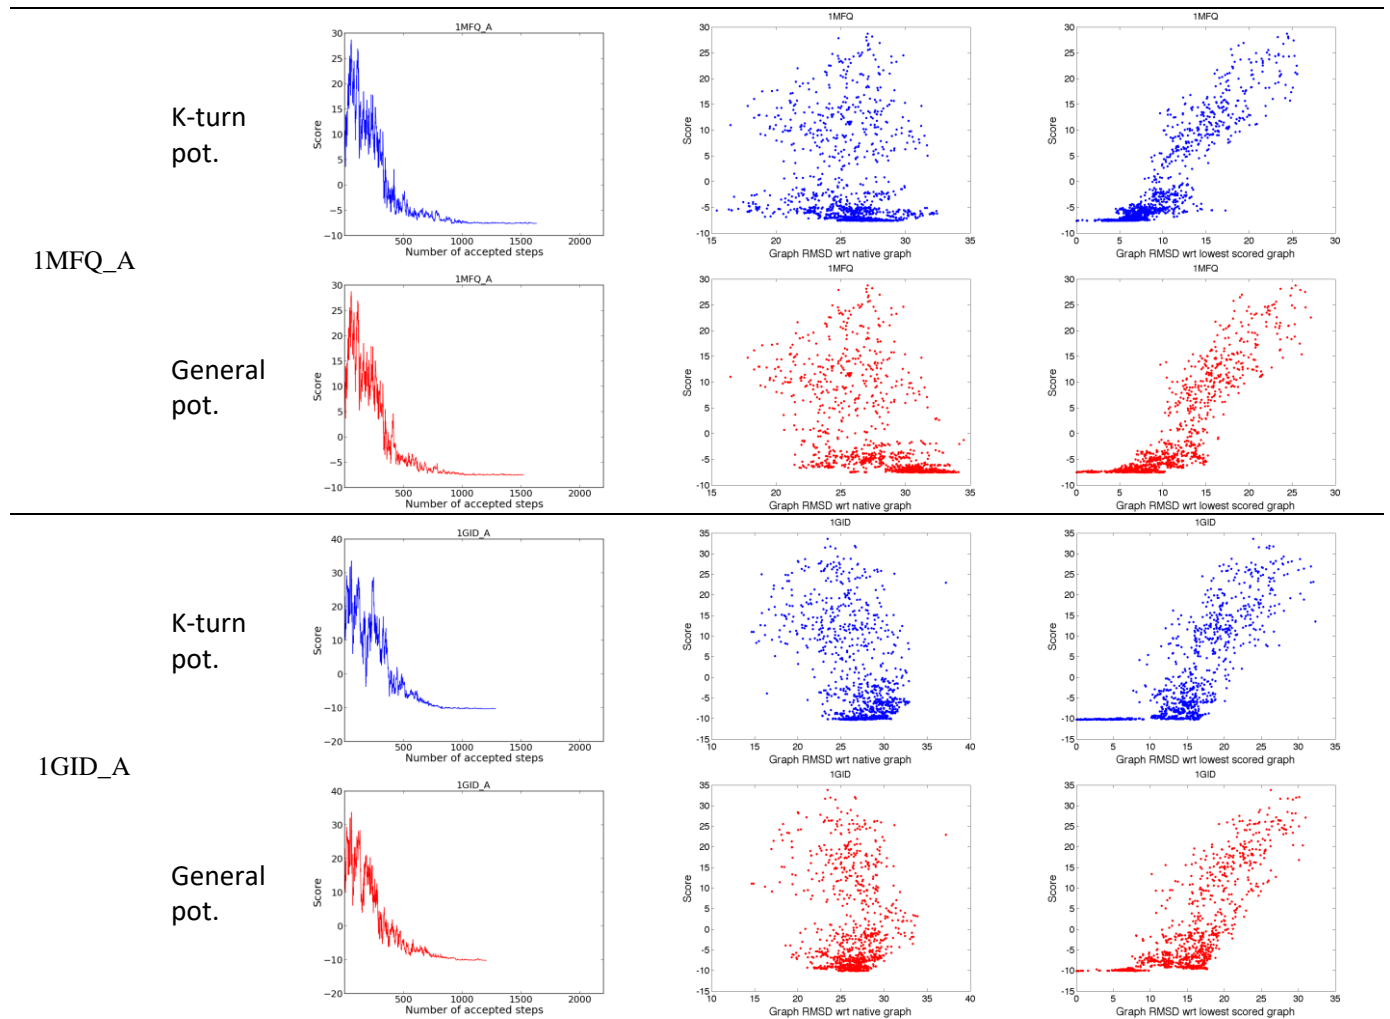

**Figure S5. MC/SA behavior.** For each of the 35 RNAs simulated, we show the convergence of the MC/SA procedure along the accepted moves (left), score-RMSD landscapes with respect to native graph (middle), and score-RMSD landscapes with respect to the lowest scored structure (right) based on k-turn and general potentials (in blue and in red, respectively).

Figure S6

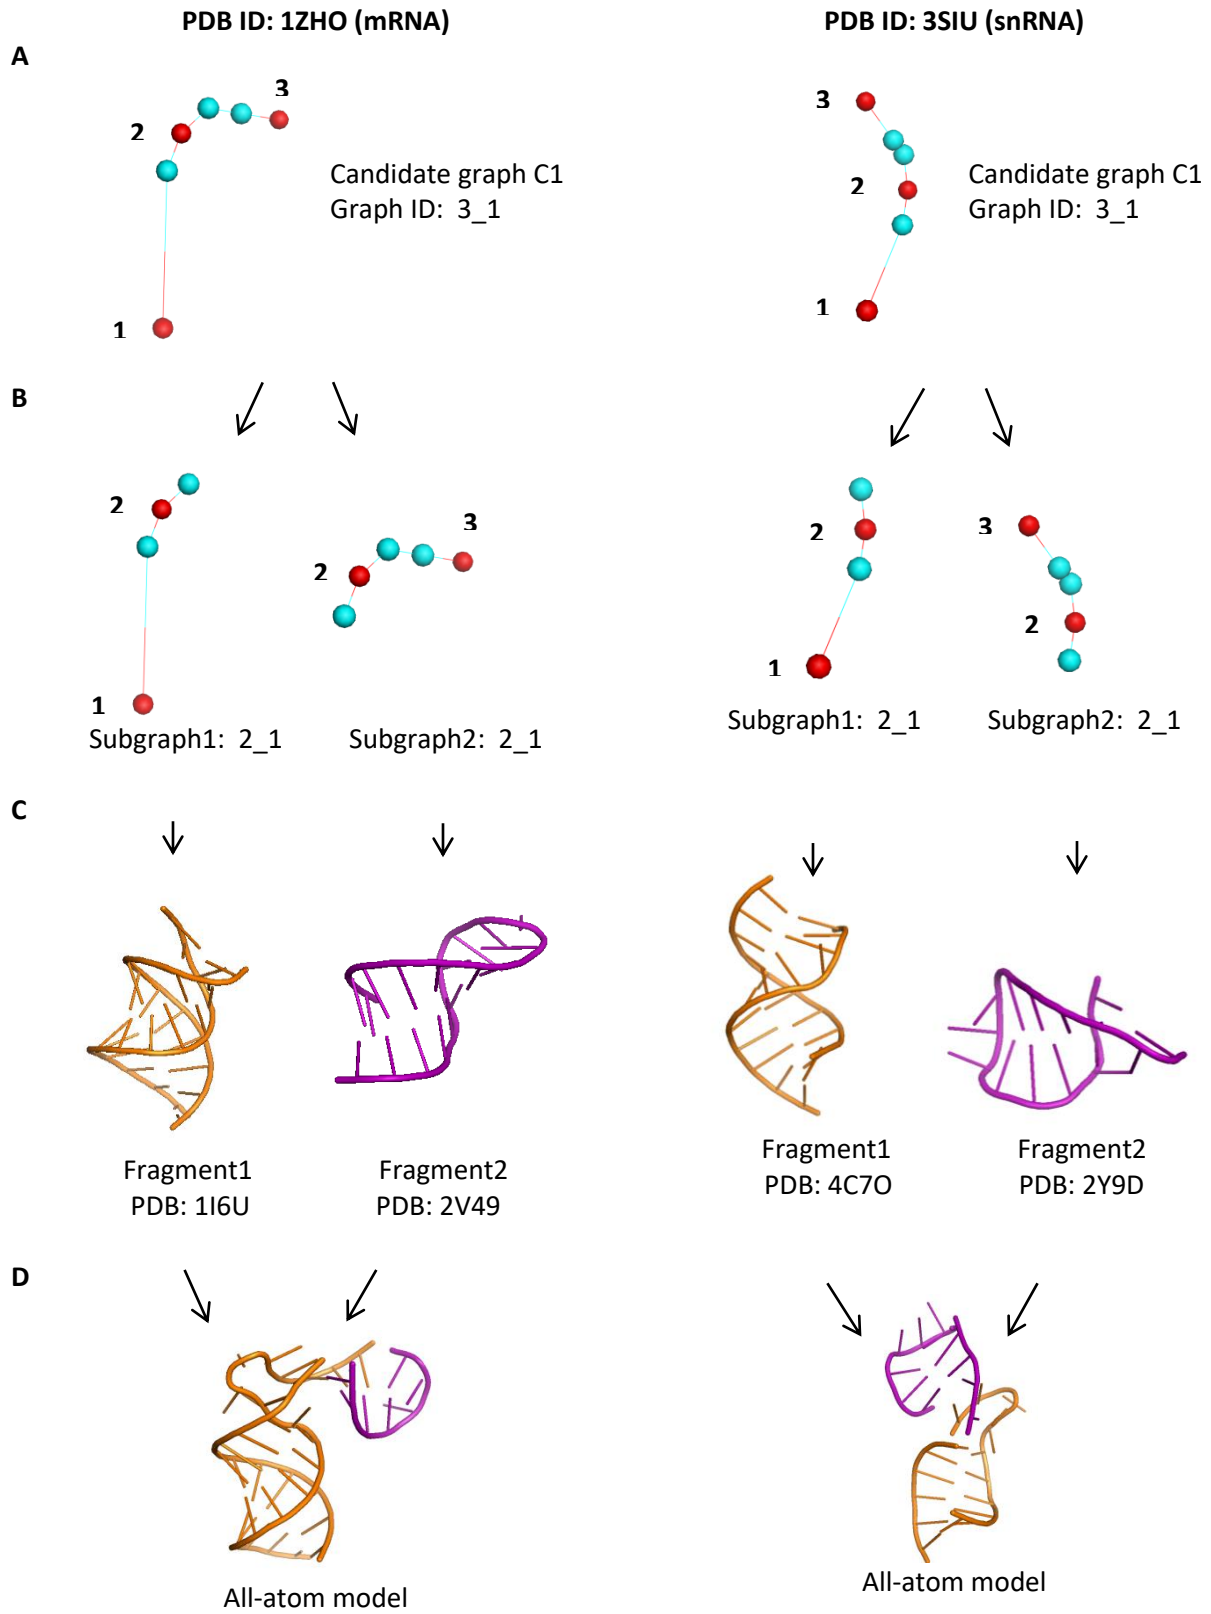

Figure S6

E

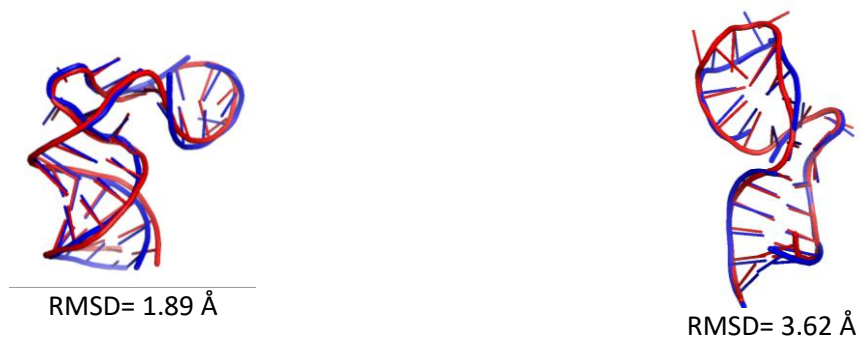

Figure S6. All-atom model generation for 1ZHO and 3SIU. A) C1 candidate graph returned by MC/SA simulations. The additional vertices included for RAG-3D are shown in cyan, the main vertices are shown in red. B) Partitioning the graph using RAG-3D search tool. C) Finding best matching fragments in RAG-3D database. Only one example is shown here, but the program considers 15. D) Assembling of the fragments by adjustment of bases, helix and loop lengths, and geometry optimization. E) Alignment of the predicted all atom model to the reference structure. All atom RMSD = 1.89 Å for 1ZHO, 3.62 Å for 3SIU. The reference structure is shown in red, and the predicted model is shown in blue.

Table S1

Table S1. K-turn structure data used for potential calculation derived by DSSR

| PDB     | Length    |           | Initial BP of |                      | Seq1             |           | Seq2 | Length    |   | K-turn type |
|---------|-----------|-----------|---------------|----------------------|------------------|-----------|------|-----------|---|-------------|
|         | of Bulge1 | of Bulge2 | Helix1        | Initial BP of Helix2 | (1b, 2b, 3b, 4b) | of Helix1 |      | of Helix2 |   |             |
| 1E7K_D  | 5         | 2         | 3             | 15                   | 9                | 12 GAGG   | CC   | 3         | 2 | normal      |
| 1FJG_A  | 4         | 6         | 233           | 275                  | 238              | 268 CAGC  | GC   | 3         | 3 | normal      |
| 1FJG_A  | 4         | 7         | 662           | 686                  | 667              | 678 UAGC  | GC   | 7         | 2 | normal      |
| 1PNU_0  | 3         | 6         | 80            | 103                  | 84               | 96 GAGC   | GC   | 6         | 2 | normal      |
| 1PNU_0  | 3         | 6         | 1370          | 1549                 | 1374             | 1542 GAGU | AC   | 7         | 2 | normal      |
| 1PNU_0  | 6         | 3         | 2065          | 2093                 | 2072             | 2089 AACC | GG   | 3         | 7 | normal      |
| 1PNX_A  | 4         | 6         | 237           | 279                  | 242              | 272 CAGC  | GC   | 3         | 3 | normal      |
| 1PNX_A  | 4         | 7         | 676           | 700                  | 681              | 692 UAGC  | GC   | 7         | 2 | normal      |
| 1S1H_A  | 4         | 6         | 223           | 265                  | 228              | 258 CAGC  | GC   | 3         | 3 | normal      |
| 1S1H_A  | 4         | 7         | 637           | 661                  | 642              | 653 UAGC  | GC   | 7         | 2 | normal      |
| 1S1I_3  | 3         | 6         | 68            | 91                   | 72               | 84 GAGC   | GC   | 6         | 3 | normal      |
| 1S1I_3  | 4         | 5         | 1545          | 1566                 | 1550             | 1560 AAGC | GC   | 5         | 3 | normal      |
| 1S1I_3  | 4         | 8         | 923           | 993                  | 928              | 984 AGGU  | GC   | 6         | 2 | normal      |
| 1S72_0  | 3         | 6         | 68            | 91                   | 72               | 84 GAGC   | GC   | 6         | 3 | normal      |
| 1S72_0  | 7         | 3         | 1107          | 1176                 | 1115             | 1172 CAGC | GC   | 10        | 5 | normal      |
| 1S72_0  | 4         | 8         | 924           | 994                  | 929              | 985 AGGU  | GC   | 6         | 2 | normal      |
| 1T0K_CD | 3         | 6         | 4             | 24                   | 8                | 17 GAGU   | GC   | 4         | 5 | normal      |
| 1U63_B  | 2         | 6         | 10            | 40                   | 13               | 33 GAGG   | CC   | 9         | 4 | normal      |
| 1YSH_B  | 4         | 7         | 32            | 56                   | 37               | 48 UAGC   | GC   | 7         | 2 | normal      |
| 1YSH_F  | 4         | 5         | 8             | 29                   | 13               | 23 AAGC   | GC   | 5         | 3 | normal      |
| 1ZHO_B  | 2         | 6         | 10            | 29                   | 13               | 22 GAGG   | CC   | 10        | 3 | normal      |

Table S1

|         |   |    |      |      |      |           |    |   |          |
|---------|---|----|------|------|------|-----------|----|---|----------|
| 2AW7_A  | 3 | 6  | 680  | 702  | 684  | 695 UAGC  | GC | 8 | 2 normal |
| 2AW7_A  | 4 | 6  | 238  | 280  | 243  | 273 UAGC  | GC | 3 | 3 normal |
| 2AW7_A  | 5 | 7  | 511  | 532  | 517  | 524 CAGC  | GC | 5 | 2 normal |
| 2GIS_A  | 3 | 6  | 17   | 38   | 21   | 31 GAGG   | CC | 3 | 3 normal |
| 2HW8_B  | 2 | 6  | 9    | 28   | 12   | 21 GAGG   | CC | 9 | 3 normal |
| 2J37_Z  | 4 | 5  | 227  | 248  | 232  | 242 AAGC  | GC | 5 | 3 normal |
| 2OZB_C  | 5 | 2  | 9    | 26   | 15   | 23 GAGG   | CC | 3 | 2 normal |
| 2QBG_B  | 6 | 3  | 1189 | 1219 | 1196 | 1215 AAGG | CU | 3 | 8 normal |
| 2VPL_B  | 2 | 6  | 9    | 39   | 12   | 32 GAGG   | CC | 9 | 4 normal |
| 2WWA_D  | 4 | 10 | 27   | 52   | 32   | 41 GAAU   | AU | 2 | 3 normal |
| 2XEB_AB | 5 | 2  | 10   | 25   | 16   | 22 GAGG   | CC | 3 | 3 normal |
| 2ZJR_X  | 3 | 6  | 80   | 103  | 84   | 96 GAGC   | GC | 6 | 2 normal |
| 2ZJR_X  | 6 | 3  | 1124 | 1154 | 1131 | 1150 AAGC | GU | 2 | 5 normal |
| 2ZJR_X  | 3 | 6  | 1329 | 1508 | 1333 | 1501 GAGU | AC | 9 | 2 normal |
| 3BBN_A  | 3 | 6  | 627  | 649  | 631  | 642 GAGC  | GC | 7 | 2 normal |
| 3BBN_A  | 4 | 6  | 208  | 250  | 213  | 243 UAGC  | GC | 3 | 3 normal |
| 3GX5_A  | 3 | 6  | 17   | 38   | 21   | 31 GAGG   | CC | 3 | 3 normal |
| 3IZ7_A  | 5 | 7  | 294  | 338  | 300  | 330 CAAC  | GU | 2 | 3 normal |
| 3IZ9_AB | 7 | 3  | 1212 | 1281 | 1220 | 1277 CAGC | GC | 2 | 5 normal |
| 3IZF_A  | 7 | 3  | 1197 | 1266 | 1205 | 1262 CAGC | GC | 9 | 5 normal |
| 3JYV_A  | 5 | 7  | 544  | 565  | 550  | 557 CAGC  | GC | 4 | 2 normal |
| 3Q3Z_A  | 6 | 3  | 10   | 52   | 17   | 48 AUGA   | UU | 2 | 9 normal |
| 3SIU_C  | 5 | 2  | 6    | 23   | 12   | 20 GAGC   | GU | 6 | 2 normal |
| 3SIV_CF | 5 | 2  | 8    | 57   | 14   | 54 GAGC   | GU | 8 | 2 normal |

Table S1

|         |   |   |      |      |      |           |    |    |          |
|---------|---|---|------|------|------|-----------|----|----|----------|
| 3SIV_CF | 2 | 5 | 22   | 46   | 25   | 40 GAGG   | CC | 2  | 8 normal |
| 3U5F_6  | 5 | 8 | 888  | 914  | 894  | 905 CAGA  | UC | 6  | 2 normal |
| 3U5F_6  | 8 | 6 | 1219 | 1254 | 1228 | 1247 UUGA | UC | 5  | 2 normal |
| 3U5H_58 | 7 | 3 | 1169 | 1238 | 1177 | 1234 CAGC | GC | 10 | 5 normal |
| 3V2F_A  | 3 | 6 | 75   | 98   | 79   | 91 GAGC   | GC | 6  | 3 normal |
| 3V2F_A  | 6 | 3 | 1152 | 1183 | 1159 | 1179 AAGG | CU | 3  | 5 normal |
| 3V2F_A  | 6 | 3 | 2048 | 2078 | 2055 | 2074 AACC | GG | 3  | 5 normal |
| 3V7E_D  | 3 | 6 | 17   | 38   | 21   | 31 GAGG   | CC | 3  | 3 normal |
| 4A1B_1  | 7 | 3 | 1245 | 1266 | 1253 | 1262 CAGC | GC | 10 | 5 normal |
| 4AEB_A  | 3 | 6 | 17   | 38   | 21   | 31 AAGA   | UU | 3  | 3 normal |
| 3UMY_B  | 6 | 3 | 2129 | 2159 | 2136 | 2155 AACC | GG | 3  | 8 normal |
| 4B5R_A  | 3 | 6 | 17   | 38   | 21   | 31 GAGC   | GC | 3  | 3 normal |
| 4BW0_A  | 3 | 6 | 3    | 23   | 7    | 16 GAGC   | GC | 3  | 3 normal |
| 4C4W_D  | 3 | 6 | 3    | 33   | 7    | 26 AAGA   | UU | 3  | 5 normal |
| 4GXY_A  | 3 | 6 | 82   | 146  | 86   | 139 GAGU  | GC | 3  | 7 normal |
| 4IOA_X  | 3 | 6 | 80   | 103  | 84   | 96 GAGC   | GC | 6  | 2 normal |
| 4IOA_X  | 6 | 3 | 1221 | 1251 | 1228 | 1247 AAGC | GU | 2  | 5 normal |
| 4IOA_X  | 3 | 6 | 1426 | 1605 | 1430 | 1598 GAGU | AC | 9  | 2 normal |
| 4KQY_A  | 3 | 6 | 17   | 38   | 21   | 31 GAGG   | CC | 5  | 3 normal |
| 4KZY_i  | 3 | 6 | 948  | 970  | 952  | 963 UAGA  | UC | 8  | 2 normal |
| 4TZZ_BC | 5 | 2 | 108  | 199  | 114  | 196 GAGA  | UC | 6  | 4 normal |

Table S2

**Table S2. List of k-turn structures with k-turn sequence signature, L, R, family types of internal loops and corresponding geometrical potentials (size, bend and torsion angles). The aptamer 100A has a reverse kink-turn.**

| PDB ID   | k-turn seq signature | Class          | L | R  | Family | (1b,2b,3b,4b) | (3n,4n) | Size  | Bend   | Torsion |
|----------|----------------------|----------------|---|----|--------|---------------|---------|-------|--------|---------|
| 1E7K_D   | Y                    | snRNA          | 2 | 5  | 2/5    | GAGG          | CC      | 8.92  | 65.75  | -23.13  |
| 2XE_B_AB | Y                    | snRNA          | 2 | 5  | 2/5    | GAGG          | CC      | 10.91 | 111.44 | -109.99 |
| 3SIU_C   | Y                    | snRNA          | 2 | 5  | 2/5    | GAGC          | GU      | 8.76  | 74.79  | -14.85  |
| 2OZB_C   | Y                    | snRNA          | 2 | 5  | 2/5    | GAGG          | CC      | 8.96  | 91.29  | -18.39  |
| 2VPL_B   | Y                    | mRNA           | 2 | 6  | 2/6+   | GAGG          | CC      | 9.12  | 69.80  | -48.82  |
| 1ZHO_B   | Y                    | mRNA           | 2 | 6  | 2/6+   | GAGG          | CC      | 9.09  | 58.75  | -38.26  |
| 2HW8_B   | Y                    | mRNA           | 2 | 6  | 2/6+   | GAGG          | CC      | 8.93  | 58.62  | -35.29  |
| 1U63_B   | Y                    | mRNA           | 2 | 6  | 2/6+   | GAGG          | CC      | 8.76  | 76.05  | -44.07  |
| 1MZP_B   | Y                    | rRNA           | 2 | 12 | 2/6+   | GAGC          | GC      | 8.72  | 71.61  | -47.68  |
| 2GIS_A   | Y                    | SAM Riboswitch | 3 | 6  | 3/6+   | GAGG          | CC      | 9.31  | 64.89  | -39.75  |
| 3V7E_D   | Y                    | SAM Riboswitch | 3 | 6  | 3/6+   | GAGG          | CC      | 8.76  | 67.53  | -32.77  |
| 100A_D   | N                    | Aptamer        | 3 | 4  | 3/4    | GAAA          | UU      | 9.59  | 100.19 | 24.07   |



Table S3

**Table S3. RMSDs of kink-turn regions (5 vertices of the internal loop) with respect to native graph structure.**

| PDB     | Kink-turn potentials | General potentials |
|---------|----------------------|--------------------|
| 1E7K_D  | 2.86                 | 3.14               |
| 2XEB_AB | 4.61                 | 6.05               |
| 3SIU_C  | 3.92                 | 4.33               |
| 2OZB_C  | 5.75                 | 5.97               |
| 2VPL_B  | 3.94                 | 7.68               |
| 1ZHO_B  | 2.88                 | 6.94               |
| 2HW8_B  | 3.01                 | 6.73               |
| 1U63_B  | 4.70                 | 9.78               |
| 1MZP_B  | 3.57                 | 4.85               |
| 2GIS_A  | 14.62                | 15.95              |
| 3V7E_D  | 17.74                | 20.23              |

Table S4

**Table S4.** 10-fold cross validation results compared to k-turn test results.

| PDB     | 10-fold cross validation |       |       | K-turn test |       |       |
|---------|--------------------------|-------|-------|-------------|-------|-------|
|         | P1                       | C1    | C2    | P1          | C1    | C2    |
| 1E7K_D  | 2.66                     | 2.67  | 2.68  | 2.64        | 2.70  | 2.76  |
| 2XEB_AB | 3.97                     | 4.69  | 4.68  | 3.73        | 4.37  | 4.37  |
| 3SIU_C  | 2.40                     | 3.23  | 3.15  | 2.46        | 3.23  | 3.22  |
| 2OZB_C  | 3.56                     | 6.14  | 5.93  | 3.49        | 6.10  | 5.68  |
| 2VPL_B  | 2.67                     | 3.77  | 3.87  | 2.78        | 3.91  | 3.77  |
| 1ZHO_B  | 2.33                     | 2.90  | 3.11  | 2.45        | 2.84  | 2.90  |
| 2HW8_B  | 2.34                     | 2.76  | 2.74  | 2.33        | 3.00  | 3.04  |
| 1U63_B  | 3.17                     | 4.22  | 4.26  | 2.99        | 4.66  | 4.62  |
| 1MZP_B  | 2.54                     | 4.43  | 4.23  | 2.68        | 4.66  | 4.62  |
| 2GIS_A  | 13.59                    | 18.06 | 18.06 | 13.58       | 17.87 | 18.07 |
| 3V7E_D  | 13.15                    | 20.08 | 21.09 | 13.15       | 21.17 | 21.23 |

Table S5

Table S5. Graph results for 35 RNA structures starting with a known 2D structure, and starting with a predicted 2D structure.

|      | Known structure                                                                                                                                                                                          | RNAFold prediction (Min. Free En.)                                                                                                                                                                         |
|------|----------------------------------------------------------------------------------------------------------------------------------------------------------------------------------------------------------|------------------------------------------------------------------------------------------------------------------------------------------------------------------------------------------------------------|
| 1E7K | 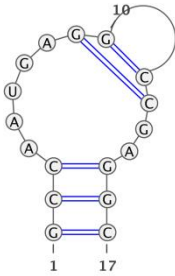 <p>K-turn pot.<br/>P1= 2.64<br/>P2= 2.70<br/>P3= 2.76</p> <p>General pot.<br/>P1= 2.63<br/>P2= 3.16<br/>P3= 3.15</p>   |  <p>K-turn pot.<br/>P1= 2.64<br/>P2= 2.69<br/>P3= 2.76</p> <p>General pot.<br/>P1= 2.63<br/>P2= 3.17<br/>P3= 3.15</p>   |
| 3SIU |  <p>K-turn pot.<br/>P1= 2.46<br/>P2= 3.23<br/>P3= 3.22</p> <p>General pot.<br/>P1= 2.28<br/>P2= 4.46<br/>P3= 4.45</p>  |  <p>K-turn pot.<br/>P1= 2.46<br/>P2= 3.23<br/>P3= 3.22</p> <p>General pot.<br/>P1= 2.28<br/>P2= 4.46<br/>P3= 4.45</p>  |
| 2XEB |  <p>K-turn pot.<br/>P1= 3.73<br/>P2= 4.37<br/>P3= 4.37</p> <p>General pot.<br/>P1= 3.61<br/>P2= 6.27<br/>P3= 6.05</p> |  <p>K-turn pot.<br/>P1= 4.03<br/>P2= 5.07<br/>P3= 4.88</p> <p>General pot.<br/>P1= 4.16<br/>P2= 6.25<br/>P3= 5.64</p> |

Table S5

|             |                                                                                                                                               |                                                                                                                                                  |                                                                                                                                               |                                                                                                                                                  |
|-------------|-----------------------------------------------------------------------------------------------------------------------------------------------|--------------------------------------------------------------------------------------------------------------------------------------------------|-----------------------------------------------------------------------------------------------------------------------------------------------|--------------------------------------------------------------------------------------------------------------------------------------------------|
| <p>2OZB</p> | 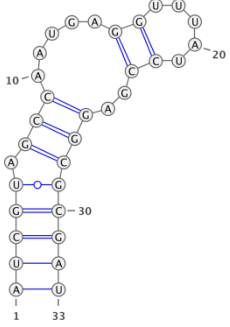 <p>K-turn pot.<br/>P1= 3.49<br/>P2= 6.10<br/>P3= 5.68</p>   |  <p>General pot.<br/>P1= 3.25<br/>P2= 6.90<br/>P3= 6.90</p>    |  <p>K-turn pot.<br/>P1= 3.49<br/>P2= 6.10<br/>P3= 5.68</p>   |  <p>General pot.<br/>P1= 3.25<br/>P2= 6.90<br/>P3= 6.90</p>    |
| <p>2HW8</p> |  <p>K-turn pot.<br/>P1= 2.33<br/>P2= 3.00<br/>P3= 3.04</p>  |  <p>General pot.<br/>P1= 2.34<br/>P2= 7.16<br/>P3= 6.44</p>  |  <p>K-turn pot.<br/>P1= 2.33<br/>P2= 3.00<br/>P3= 3.04</p>  |  <p>General pot.<br/>P1= 2.34<br/>P2= 7.16<br/>P3= 6.44</p>  |
| <p>1ZHO</p> |  <p>K-turn pot.<br/>P1= 2.45<br/>P2= 2.84<br/>P3= 2.90</p> |  <p>General pot.<br/>P1= 2.45<br/>P2= 7.11<br/>P3= 6.55</p> |  <p>K-turn pot.<br/>P1= 2.46<br/>P2= 2.85<br/>P3= 2.90</p> |  <p>General pot.<br/>P1= 2.45<br/>P2= 7.11<br/>P3= 6.55</p> |

Table S5

|             |                                                                                                                                               |                                                                                                                                                |                                                                                                                                                |                                                                                                                                                 |
|-------------|-----------------------------------------------------------------------------------------------------------------------------------------------|------------------------------------------------------------------------------------------------------------------------------------------------|------------------------------------------------------------------------------------------------------------------------------------------------|-------------------------------------------------------------------------------------------------------------------------------------------------|
| <p>2VPL</p> | 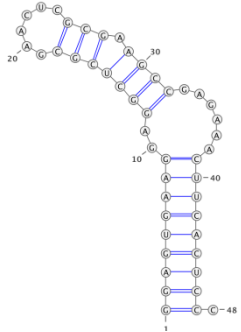 <p>K-turn pot.<br/>P1= 2.78<br/>P2= 3.91<br/>P3= 3.77</p>   |  <p>General pot.<br/>P1= 2.67<br/>P2= 7.59<br/>P3= 7.05</p>   |  <p>K-turn pot.<br/>P1= 2.91<br/>P2= 4.15<br/>P3= 4.16</p>   |  <p>General pot.<br/>P1= 3.60<br/>P2= 7.87<br/>P3= 7.42</p>   |
| <p>1U63</p> |  <p>K-turn pot.<br/>P1= 2.99<br/>P2= 4.66<br/>P3= 4.62</p>  |  <p>General pot.<br/>P1= 2.99<br/>P2= 9.34<br/>P3= 6.86</p>  |  <p>K-turn pot.<br/>P1= 2.56<br/>P2= 4.63<br/>P3= 4.55</p>  |  <p>General pot.<br/>P1= 3.71<br/>P2= 7.68<br/>P3= 8.09</p>  |
| <p>1MZP</p> |  <p>K-turn pot.<br/>P1= 2.68<br/>P2= 4.66<br/>P3= 4.62</p> |  <p>General pot.<br/>P1= 3.70<br/>P2= 6.72<br/>P3= 6.60</p> |  <p>K-turn pot.<br/>P1= 3.85<br/>P2= 5.64<br/>P3= 5.53</p> |  <p>General pot.<br/>P1= 3.53<br/>P2= 7.14<br/>P3= 7.29</p> |

Table S5

|                           |                                                                                                                                                 |                                                                                                                                                   |                                                                                                                                                  |                                                                                                                                                  |
|---------------------------|-------------------------------------------------------------------------------------------------------------------------------------------------|---------------------------------------------------------------------------------------------------------------------------------------------------|--------------------------------------------------------------------------------------------------------------------------------------------------|--------------------------------------------------------------------------------------------------------------------------------------------------|
| <p>2GIS</p>               | 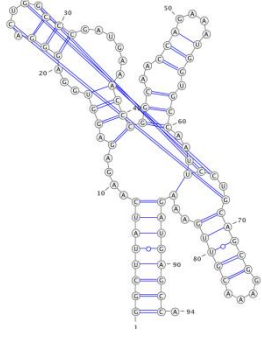 <p>K-turn pot.<br/>P1= 13.58<br/>P2= 17.87<br/>P3= 18.07</p>  |  <p>General pot.<br/>P1= 13.45<br/>P2= 18.31<br/>P3= 18.52</p>  |  <p>K-turn pot.<br/>P1= 14.47<br/>P2= 18.89<br/>P3= 19.06</p>  |  <p>General pot.<br/>P1= 14.20<br/>P2= 18.76<br/>P3= 18.94</p> |
| <p>3V7E</p>               |  <p>K-turn pot.<br/>P1= 13.15<br/>P2= 21.17<br/>P3= 21.23</p> |  <p>General pot.<br/>P1= 13.15<br/>P2= 22.26<br/>P3= 22.30</p> |  <p>K-turn pot.<br/>P1= 14.46<br/>P2= 18.91<br/>P3= 19.06</p> |  <p>General pot.<br/>P1=14.46<br/>P2= 19.57<br/>P3= 19.72</p> |
| <p><b>Non K-turns</b></p> |                                                                                                                                                 |                                                                                                                                                   |                                                                                                                                                  |                                                                                                                                                  |
| <p>IRLG</p>               |  <p>K-turn pot.<br/>P1= 2.43<br/>P2= 3.81<br/>P3= 3.97</p>   |  <p>General pot.<br/>P1= 2.49<br/>P2= 3.80<br/>P3= 3.58</p>  |  <p>K-turn pot.<br/>P1= 6.01<br/>P2= 6.18<br/>P3= 6.27</p>  |  <p>General pot.<br/>P1= 6.07<br/>P2= 6.28<br/>P3= 6.28</p> |

Table S5

|             |                                                                                                                                               |                                                                                                                                                 |                                                                                                                                                |                                                                                                                                                 |
|-------------|-----------------------------------------------------------------------------------------------------------------------------------------------|-------------------------------------------------------------------------------------------------------------------------------------------------|------------------------------------------------------------------------------------------------------------------------------------------------|-------------------------------------------------------------------------------------------------------------------------------------------------|
| <p>100A</p> | 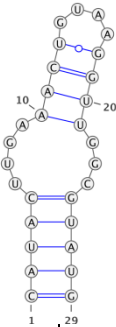 <p>K-turn pot.<br/>P1= 2.65<br/>P2= 3.76<br/>P3= 3.15</p>   |  <p>General pot.<br/>P1= 2.65<br/>P2= 3.76<br/>P3= 3.15</p>  |  <p>K-turn pot.<br/>P1= 2.65<br/>P2= 3.76<br/>P3= 3.15</p>  |  <p>General pot.<br/>P1= 2.65<br/>P2= 3.76<br/>P3= 3.15</p>  |
| <p>2IPY</p> |  <p>K-turn pot.<br/>P1= 2.01<br/>P2= 2.22<br/>P3= 2.18</p>  |  <p>General pot.<br/>P1= 2.01<br/>P2= 2.22<br/>P3= 2.18</p> |  <p>K-turn pot.<br/>P1= 2.01<br/>P2= 2.22<br/>P3= 2.19</p> |  <p>General pot.<br/>P1= 2.01<br/>P2= 2.22<br/>P3= 2.19</p> |
| <p>1MJI</p> |  <p>K-turn pot.<br/>P1= 2.38<br/>P2= 3.26<br/>P3= 3.24</p> |  <p>General pot.<br/>P1= 2.38<br/>P2= 3.44<br/>P3= 3.39</p> |  <p>K-turn pot.<br/>P1= 2.38<br/>P2= 3.25<br/>P3= 3.24</p> |  <p>General pot.<br/>P1= 2.38<br/>P2= 3.44<br/>P3= 3.39</p> |

Table S5

|             |                                                                                                                                                                                                          |                                                                                                                                                                                                           |
|-------------|----------------------------------------------------------------------------------------------------------------------------------------------------------------------------------------------------------|-----------------------------------------------------------------------------------------------------------------------------------------------------------------------------------------------------------|
| <p>1I6U</p> | 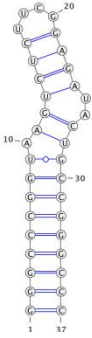 <p>K-turn pot.<br/>P1= 1.56<br/>P2= 2.44<br/>P3= 2.30</p> <p>General pot.<br/>P1= 1.61<br/>P2= 2.39<br/>P3= 2.39</p>   |  <p>K-turn pot.<br/>P1= 2.46<br/>P2= 2.87<br/>P3= 3.16</p> <p>General pot.<br/>P1= 2.46<br/>P2= 2.87<br/>P3= 3.16</p>  |
| <p>1F1T</p> |  <p>K-turn pot.<br/>P1= 1.93<br/>P2= 2.77<br/>P3= 2.77</p> <p>General pot.<br/>P1= 1.96<br/>P2= 2.67<br/>P3= 2.65</p>  |  <p>K-turn pot.<br/>P1= 1.93<br/>P2= 2.77<br/>P3= 2.77</p> <p>General pot.<br/>P1= 1.96<br/>P2= 2.67<br/>P3= 2.65</p>  |
| <p>1S03</p> |  <p>K-turn pot.<br/>P1= 1.94<br/>P2= 4.18<br/>P3= 3.87</p> <p>General pot.<br/>P1= 1.98<br/>P2= 4.29<br/>P3= 4.28</p> |  <p>K-turn pot.<br/>P1= 2.03<br/>P2= 5.30<br/>P3= 5.21</p> <p>General pot.<br/>P1= 1.89<br/>P2= 5.40<br/>P3= 5.07</p> |



Table S5

|             |                                                                                                                                               |                                                            |                                                                                                                                                    |                                                               |
|-------------|-----------------------------------------------------------------------------------------------------------------------------------------------|------------------------------------------------------------|----------------------------------------------------------------------------------------------------------------------------------------------------|---------------------------------------------------------------|
| <p>1XJR</p> | 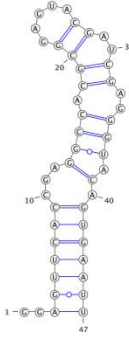 <p>K-turn pot.<br/>P1= 3.99<br/>P2= 6.26<br/>P3= 6.32</p>   | <p>General pot.<br/>P1= 4.23<br/>P2= 6.43<br/>P3= 6.30</p> |  <p>K-turn pot.<br/>P1= 3.99<br/>P2= 6.26<br/>P3= 6.32</p>      | <p>General pot.<br/>P1= 4.23<br/>P2= 6.43<br/>P3= 6.30</p>    |
| <p>2PXB</p> |  <p>K-turn pot.<br/>P1= 1.99<br/>P2= 3.88<br/>P3= 2.72</p>  | <p>General pot.<br/>P1= 1.99<br/>P2= 3.88<br/>P3= 2.72</p> |  <p>K-turn pot.<br/>P1= 8.86<br/>P2= 9.08<br/>P3= 9.89</p>     | <p>General pot.<br/>P1= 8.86<br/>P2= 9.08<br/>P3= 9.89</p>    |
| <p>2OIU</p> |  <p>K-turn pot.<br/>P1= 4.51<br/>P2= 6.61<br/>P3= 6.87</p> | <p>General pot.<br/>P1= 4.51<br/>P2= 6.61<br/>P3= 6.87</p> |  <p>K-turn pot.<br/>P1= 12.10<br/>P2= 16.04<br/>P3= 15.82</p> | <p>General pot.<br/>P1= 12.10<br/>P2= 16.04<br/>P3= 15.82</p> |

Table S5

|             |                                                                                                                                               |                                                             |                                                                                                                                                  |                                                              |
|-------------|-----------------------------------------------------------------------------------------------------------------------------------------------|-------------------------------------------------------------|--------------------------------------------------------------------------------------------------------------------------------------------------|--------------------------------------------------------------|
| <p>2HG1</p> | 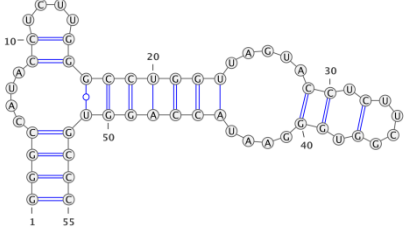 <p>K-turn pot.<br/>P1= 4.24<br/>P2= 6.15<br/>P3= 6.40</p>   | <p>General pot.<br/>P1= 4.24<br/>P2= 6.43<br/>P3= 6.24</p>  |  <p>K-turn pot.<br/>P1= 4.51<br/>P2= 5.48<br/>P3= 5.53</p>     | <p>General pot.<br/>P1= 4.51<br/>P2= 5.48<br/>P3= 5.53</p>   |
| <p>1DK1</p> |  <p>K-turn pot.<br/>P1= 4.42<br/>P2= 6.76<br/>P3= 8.67</p>  | <p>General pot.<br/>P1= 4.42<br/>P2= 6.73<br/>P3= 10.43</p> |  <p>K-turn pot.<br/>P1= 8.18<br/>P2= 11.77<br/>P3= 12.51</p>  | <p>General pot.<br/>P1= 8.18<br/>P2= 11.77<br/>P3= 12.51</p> |
| <p>1MMS</p> |  <p>K-turn pot.<br/>P1= 4.64<br/>P2= 9.19<br/>P3= 9.26</p> | <p>General pot.<br/>P1= 4.64<br/>P2= 9.19<br/>P3= 9.26</p>  |  <p>K-turn pot.<br/>P1= 8.62<br/>P2= 14.20<br/>P3= 14.12</p> | <p>General pot.<br/>P1= 8.62<br/>P2= 14.20<br/>P3= 14.12</p> |

Table S5

|             |                                                                                     |                                                                                                                      |                                                                                      |                                                                                                                            |
|-------------|-------------------------------------------------------------------------------------|----------------------------------------------------------------------------------------------------------------------|--------------------------------------------------------------------------------------|----------------------------------------------------------------------------------------------------------------------------|
| <p>1D4R</p> | 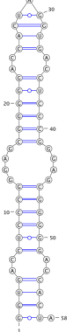   | <p>K-turn pot.<br/>P1= 5.95<br/>P2= 8.17<br/>P3= 7.87</p> <p>General pot.<br/>P1=5.95<br/>P2= 8.17<br/>P3= 7.87</p>  |   | <p>K-turn pot.<br/>P1= 19.72<br/>P2= 26.24<br/>P3= 26.37</p> <p>General pot.<br/>P1= 20.22<br/>P2= 26.77<br/>P3= 26.67</p> |
| <p>1KXK</p> |   | <p>K-turn pot.<br/>P1= 2.99<br/>P2= 4.07<br/>P3= 5.48</p> <p>General pot.<br/>P1= 3.48<br/>P2= 5.52<br/>P3= 4.58</p> |   | <p>K-turn pot.<br/>P1= 3.52<br/>P2= 5.10<br/>P3= 5.04</p> <p>General pot.<br/>P1= 2.67<br/>P2= 5.27<br/>P3= 5.03</p>       |
| <p>1SJ4</p> |  | <p>K-turn pot.<br/>P1= 6.51<br/>P2= 7.36<br/>P3= 7.92</p> <p>General pot.<br/>P1= 6.07<br/>P2= 7.00<br/>P3= 7.06</p> |  | <p>K-turn pot.<br/>P1= 8.85<br/>P2= 10.78<br/>P3= 10.63</p> <p>General pot.<br/>P1= 9.63<br/>P2= 10.41<br/>P3= 10.41</p>   |

Table S5

|             |                                                                                                                                                                                                              |                                                                                                                                                                                                                 |
|-------------|--------------------------------------------------------------------------------------------------------------------------------------------------------------------------------------------------------------|-----------------------------------------------------------------------------------------------------------------------------------------------------------------------------------------------------------------|
| <p>1P5O</p> | 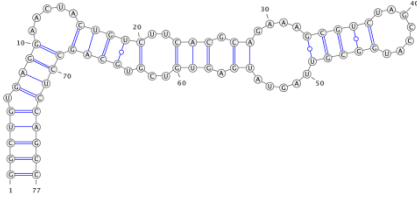 <p>K-turn pot.<br/>P1= 5.58<br/>P2= 11.21<br/>P3= 11.75</p> <p>General pot.<br/>P1= 5.49<br/>P2= 10.40<br/>P3= 10.33</p>   |  <p>K-turn pot.<br/>P1= 4.34<br/>P2= 6.16<br/>P3= 7.28</p> <p>General pot.<br/>P1= 4.90<br/>P2= 9.81<br/>P3= 11.57</p>        |
| <p>3D2G</p> |  <p>K-turn pot.<br/>P1= 7.16<br/>P2= 16.81<br/>P3= 17.05</p> <p>General pot.<br/>P1= 6.06<br/>P2= 13.11<br/>P3= 13.46</p>  |  <p>K-turn pot.<br/>P1= 13.14<br/>P2= 17.41<br/>P3= 17.23</p> <p>General pot.<br/>P1= 13.14<br/>P2= 15.08<br/>P3= 16.82</p>  |
| <p>2HOJ</p> |  <p>K-turn pot.<br/>P1= 6.63<br/>P2= 17.24<br/>P3= 16.24</p> <p>General pot.<br/>P1= 6.63<br/>P2= 18.06<br/>P3= 16.85</p> |  <p>K-turn pot.<br/>P1= 13.95<br/>P2= 23.92<br/>P3= 23.96</p> <p>General pot.<br/>P1= 13.95<br/>P2= 25.95<br/>P3= 23.54</p> |

Table S5

|             |                                                                                                                                                                                                                |                                                                                                                                                                                                                 |
|-------------|----------------------------------------------------------------------------------------------------------------------------------------------------------------------------------------------------------------|-----------------------------------------------------------------------------------------------------------------------------------------------------------------------------------------------------------------|
| <p>2GDI</p> | 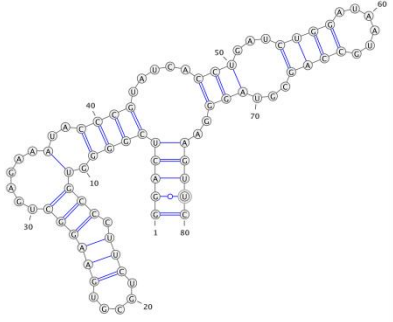 <p>K-turn pot.<br/>P1= 7.14<br/>P2= 18.60<br/>P3= 19.57</p> <p>General pot.<br/>P1= 7.03<br/>P2= 17.56<br/>P3= 17.80</p>     |  <p>K-turn pot.<br/>P1= 13.49<br/>P2= 17.95<br/>P3= 17.37</p> <p>General pot.<br/>P1= 13.63<br/>P2= 17.07<br/>P3= 17.97</p>   |
| <p>1LNG</p> |  <p>K-turn pot.<br/>P1= 5.53<br/>P2= 14.79<br/>P3= 17.51</p> <p>General pot.<br/>P1= 5.61<br/>P2= 15.01<br/>P3= 13.85</p>    |  <p>K-turn pot.<br/>P1= 6.06<br/>P2= 14.86<br/>P3= 17.62</p> <p>General pot.<br/>P1= 6.06<br/>P2= 19.22<br/>P3= 22.07</p>    |
| <p>2LKR</p> |  <p>K-turn pot.<br/>P1= 14.25<br/>P2= 21.82<br/>P3= 22.32</p> <p>General pot.<br/>P1= 14.25<br/>P2= 18.20<br/>P3= 20.66</p> |  <p>K-turn pot.<br/>P1= 25.45<br/>P2= 40.32<br/>P3= 39.97</p> <p>General pot.<br/>P1= 25.45<br/>P2= 40.89<br/>P3= 40.10</p> |

Table S5

|      |                                                                                                                                                                                                               |                                                                                                                                                                                                                |
|------|---------------------------------------------------------------------------------------------------------------------------------------------------------------------------------------------------------------|----------------------------------------------------------------------------------------------------------------------------------------------------------------------------------------------------------------|
| 1MFQ | 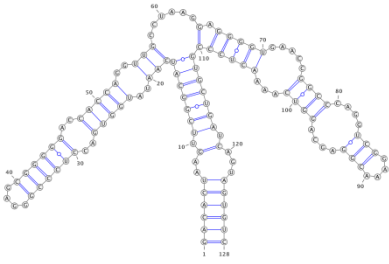 <p>K-turn pot.<br/>P1= 15.41<br/>P2= 27.24<br/>P3= 27.44</p> <p>General pot.<br/>P1= 16.48<br/>P2= 30.22<br/>P3= 26.97</p>  |  <p>K-turn pot.<br/>P1= 30.54<br/>P2= 30.55<br/>P3= 30.56</p> <p>General pot.<br/>P1= 30.54<br/>P2= 30.55<br/>P3= 30.56</p>  |
| 1GID |  <p>K-turn pot.<br/>P1= 14.66<br/>P2= 26.18<br/>P3= 25.65</p> <p>General pot.<br/>P1= 14.66<br/>P2= 25.13<br/>P3= 26.19</p> |  <p>K-turn pot.<br/>P1= 16.59<br/>P2= 29.48<br/>P3= 30.52</p> <p>General pot.<br/>P1= 18.61<br/>P2= 29.67<br/>P3= 30.74</p> |

1. Daldrop, P. and Lilley, D.M. (2013) The plasticity of a structural motif in RNA: structural polymorphism of a kink turn as a function of its environment. *RNA*, **19**, 357-364.
2. Kim, N., Laing, C., Elmetwaly, S., Jung, S., Curuksu, J. and Schlick, T. (2014) Graph-based sampling for approximating global helical topologies of RNA. *Proc. Nat. Acad. Sci. USA*, **111**, 4079-4084.
3. Kerpedjiev, P., Höner zu Siederdisen, C. and Hofacker, I.L. (2015) Predicting RNA 3D structure using a coarse-grain helix-centered model. *RNA*, **21**, 1110-1121.
4. Yang, H., Jossinet, F., Leontis, N., Chen, L., Westbrook, J., Berman, H. and Westhof, E. (2003) Tools for the automatic identification and classification of RNA base pairs. *Nucleic Acids Res.*, **31**, 3450-3460.
5. Gendron, P., Lemieux, S. and Major, F. (2001) Quantitative analysis of nucleic acid three-dimensional structures. *J Mol. Biol.*, **308**, 919-936.
6. Petrov, A.I., Zirbel, C.L. and Leontis, N.B. (2011) WebFR3D—a server for finding, aligning and analyzing recurrent RNA 3D motifs. *Nucleic Acids Res.*, gkr249.
